# Supplementary material for: Construction of N-Ferrocene Substituted Benzodihydrooxazoles via a Catalyst-Free Aza-Michael Addition/C(sp3)-O Bond Formation Tandem Reaction
Source: MDPI journal article supplement (doi:10.3390/molecules28145615), 2023-07-24

## Supporting Information for

# Construction of *N*-ferrocene Substituted Benzodihydrooxazole via Catalyst-free Aza-Michael Addition/C(sp<sup>3</sup>)-O Bond Formation Tandem Reaction

Zhang, Mingliang<sup>†, a</sup>    Zhao, Pin<sup>†, b</sup>    Liu, Qilv<sup>a</sup>    Liu, Xinlei<sup>a</sup>    Hu,  
Jingya<sup>a</sup>    Wu, Dongqing<sup>\*, a</sup>    Liu, Lantao<sup>\*, a, b</sup>

(<sup>a</sup> School of Chemistry and Chemical Engineering, Henan Engineering Research Center of Green  
Synthesis for Pharmaceuticals, Shangqiu Normal University, Shangqiu, 476000)

(<sup>b</sup> College of Chemistry, Zhengzhou University, Zhengzhou 450052)

\*E-mail: [liult05@iccas.ac.cn](mailto:liult05@iccas.ac.cn); [iamwudongqing@163.com](mailto:iamwudongqing@163.com)

## Table of contents

|                                                                                                                           |   |
|---------------------------------------------------------------------------------------------------------------------------|---|
| 1. General Information.....                                                                                               | 2 |
| 2. Optimization of reaction conditions.....                                                                               | 2 |
| 3. General Procedure for Catalyst-free Aza-Michael Addition/C(sp <sup>3</sup> )-O Bond Formation Tandem<br>Reaction ..... | 2 |
| 3. Characterizations of Compounds <b>3</b> .....                                                                          | 3 |
| 5. NMR Spectra for compounds <b>3</b> .....                                                                               | 7 |

## 1. General Information

$^1\text{H}$  NMR (400 MHz),  $^{13}\text{C}$  NMR (101 MHz) spectra were recorded on a Bruker 400 spectrometer. Chemical shifts were reported in parts per million (ppm) referenced to tetramethylsilane (0.00 ppm) or residue of  $\text{CDCl}_3$  (7.26 ppm). Mass spectra (HRMS) were collected on a quadrupole time-of-flight mass spectrometer (Bruker Impact II, Bremen, Germany). Melting points were obtained on a SGW X-4 melting point apparatus. All solvents used were distilled with standard techniques.

## 2. Optimization of reaction conditions<sup>a</sup>

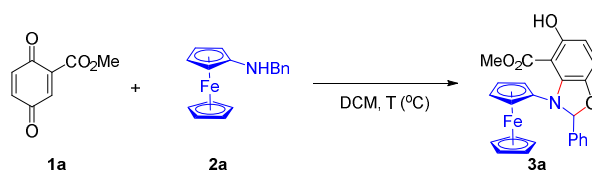

| entry | ratio            | T (°C) | time (h) | yield (%) <sup>b</sup> |
|-------|------------------|--------|----------|------------------------|
| 1     | 2:1              | 40     | 11       | 71                     |
| 2     | 2:1              | 35     | 8        | 91                     |
| 3     | 2:1              | 25     | 11       | 50                     |
| 4     | 2:1              | 10     | 13       | 75                     |
| 5     | 2:1              | 35     | 17       | >99                    |
| 6     | 2:1              | 35     | 24       | 95                     |
| 7     | 3:1 <sup>c</sup> | 35     | 17       | 37                     |
| 8     | 1:1 <sup>d</sup> | 35     | 17       | 40                     |

<sup>a</sup> Unless otherwise noted, the reaction was carried out with **1a** (0.10 mmol, 2.0 equiv.), **2a** (0.05 mmol, 1.0 equiv.), DCM (0.5 mL). <sup>b</sup> Isolated yield. <sup>c</sup> 0.15 mmol **1a** (3.0 equiv.) was used. <sup>d</sup> 0.05 mmol **1a** (1.0 equiv.) was used.  
DCM = dichloromethane

## 3. General Procedure for Catalyst-free Aza-Michael Addition/C(sp<sup>3</sup>)-O

### Bond Formation Tandem Reaction

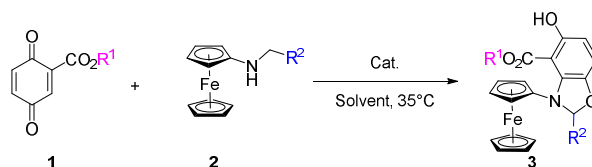

*p*-Benzoquinones **1** (0.1 mmol, 1.0 equiv.), amino ferrocenes **2** (0.05 mmol, 0.5 equiv.) were dissolved in dichloromethane (0.5 mL) in a test tubes. The mixture was stirred at 35 °C in an oil bath and monitored by thin-layer chromatography (TLC). Upon the reaction completion, the mixture was charged onto a silica gel column directly, and the desired product **3** was purified by flash chromatography with petroleum ether/ethyl acetate (v/v = 15:1) as eluent.

### 3. Characterizations of Compounds 3

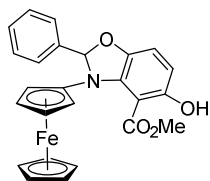

**methyl 3-ferrocenyl-5-hydroxy-2-phenyl-2,3-dihydrobenzo[d]oxazole-4-carboxylate (3a).** Brown oil. 22.6 mg, >99% yield.  $^1\text{H}$  NMR (400 MHz,  $\text{CDCl}_3$ )  $\delta$  10.09 (s, 1H), 7.55 (dd,  $J = 7.5$  Hz,  $J = 1.7$  Hz, 2H), 7.40 (dd,  $J = 5.6$  Hz,  $J = 3.7$  Hz, 3H), 7.16 (s, 1H), 6.91 (d,  $J = 8.5$  Hz, 1H), 6.49 (d,  $J = 8.6$  Hz, 1H), 4.21 (s, 5H), 4.16 - 4.12 (m, 1H), 4.06 - 4.02 (m, 1H), 3.97 - 3.94 (m, 1H), 3.63 - 3.59 (m, 1H), 3.55 (s, 3H);  $^{13}\text{C}$  NMR (101 MHz,  $\text{CDCl}_3$ )  $\delta$  169.3, 155.2, 143.9, 139.3, 135.8, 129.3, 128.7, 126.2, 114.6, 109.2, 108.2, 102.8, 102.5, 68.7, 64.9, 63.1, 62.1, 57.2, 51.8. HRMS (ESI-TOF)  $m/z$ :  $[\text{M}]^+$  calcd for  $\text{C}_{25}\text{H}_{21}\text{FeNO}_4$  455.0814; found 455.0811.

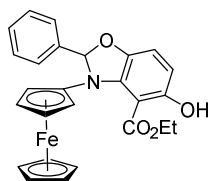

**ethyl 3-ferrocenyl-5-hydroxy-2-phenyl-2,3-dihydrobenzo[d]oxazole-4-carboxylate (3b).** Brown oil. 22.7 mg, 97% yield.  $^1\text{H}$  NMR (400 MHz,  $\text{CDCl}_3$ )  $\delta$  10.18 (s, 1H), 7.53-7.46 (m, 2H), 7.36-7.26 (m, 3H), 7.08 (s, 1H), 6.86 (d,  $J = 8.6$  Hz, 1H), 6.44 (d,  $J = 8.6$  Hz, 1H), 4.13 (s, 5H), 4.10 (d,  $J = 2.1$  Hz, 1H), 4.09-4.03 (m, 1H), 3.97-3.95 (m, 1H), 3.95-3.89 (m, 1H), 3.89-3.85 (m, 1H), 3.58-3.55 (m, 1H), 0.90 (t,  $J = 7.1$  Hz, 3H);  $^{13}\text{C}$  NMR (101 MHz,  $\text{CDCl}_3$ )  $\delta$  167.9, 154.3, 142.9, 138.4, 134.4, 128.1, 127.6, 125.1, 113.7, 108.6, 107.8, 102.0, 101.3, 67.7, 63.8, 62.0, 61.1, 60.3, 55.8, 12.5. HRMS (ESI-TOF)  $m/z$ :  $[\text{M}]^+$  calcd for  $\text{C}_{26}\text{H}_{23}\text{FeNO}_4$  469.0971; found 469.0972.

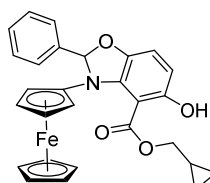

**cyclopropylmethyl 3-ferrocenyl-5-hydroxy-2-phenyl-2,3-dihydrobenzo[d]oxazole-4-carboxylate (3c).** Orange solid. 23.4 mg, 94% yield. m.p. = 120.5-122.1  $^{\circ}\text{C}$ .  $^1\text{H}$  NMR (400 MHz,  $\text{CDCl}_3$ )  $\delta$  10.11 (s, 1H), 7.55 (dd,  $J = 7.4$  Hz,  $J = 1.7$  Hz, 2H), 7.35-7.26 (m, 3H), 7.08 (s, 1H), 6.86 (d,  $J = 8.6$  Hz, 1H), 6.44 (d,  $J = 8.6$  Hz, 1H), 4.16-4.09 (m, 6H), 3.96-3.92 (m, 1H), 3.90-3.83 (m, 2H), 3.69 (dd,  $J = 11.3$  Hz,  $J = 7.0$  Hz, 1H), 3.57 (dt,  $J = 2.6$  Hz,  $J = 1.3$  Hz, 1H), 0.73-0.62 (m, 1H), 0.44-0.30 (m, 2H), 0.11-0.06 (m, 1H), 0.05-0.01 (m, 1H);  $^{13}\text{C}$  NMR (101 MHz,  $\text{CDCl}_3$ )  $\delta$  167.9, 154.2, 142.9, 138.4, 134.3, 128.0, 127.5, 125.2, 113.7, 108.7, 107.6, 102.2, 100.9, 69.2, 67.6, 63.7, 62.1, 60.8, 55.8, 8.1, 2.32, 2.26. HRMS (ESI-TOF)  $m/z$ :  $[\text{M}]^+$  calcd for  $\text{C}_{28}\text{H}_{25}\text{FeNO}_4$  495.1127; found 495.1122.

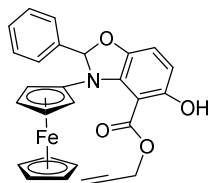

**but-2-yn-1-yl 3-ferrocenyl-5-hydroxy-2-phenyl-2,3-dihydrobenzo[d]oxazole-4-carboxylate (3d).** Orange oil. 20.0 mg, 81% yield.  $^1\text{H}$  NMR (400 MHz,  $\text{CDCl}_3$ )  $\delta$  9.87 (s, 1H), 7.57-7.50 (m, 2H), 7.36-7.30 (m, 3H), 7.10 (s, 1H), 6.85 (d,  $J = 8.6$  Hz, 1H), 6.42 (d,  $J = 8.6$  Hz, 1H), 4.64 (dd,  $J = 15.1$  Hz,  $J = 2.3$  Hz, 1H), 4.26 (dd,  $J = 15.1$  Hz,  $J = 2.3$  Hz, 1H), 4.13 (s, 5H), 4.09 (d,  $J = 1.1$  Hz, 1H), 3.97 (d,  $J = 1.2$  Hz, 1H), 3.87 (d,  $J = 1.2$  Hz, 1H), 3.57 (d,  $J = 1.1$  Hz, 1H), 1.72 (t,  $J = 2.3$  Hz, 3H);  $^{13}\text{C}$  NMR (101 MHz,  $\text{CDCl}_3$ )  $\delta$  167.2, 158.3, 154.2, 143.0, 138.3, 134.8, 128.1, 127.6, 125.3, 113.8, 108.3, 107.3, 101.5, 101.3, 82.4, 71.4, 67.7, 63.8, 62.1, 61.1, 56.2, 52.2, 2.6. HRMS (ESI-TOF)  $m/z$ :  $[\text{M}]^+$  calcd for  $\text{C}_{28}\text{H}_{23}\text{FeNO}_4$  493.0971; found 493.0969.

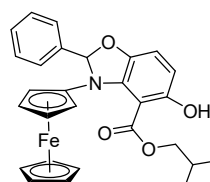

**isobutyl 3-ferrocenyl-5-hydroxy-2-phenyl-2,3-dihydrobenzo[d]oxazole-4-carboxylate (3e).** Orange solid. 14.8 mg, 59% yield. m.p. = 119.3-121.0  $^{\circ}\text{C}$ .  $^1\text{H}$  NMR (400 MHz,  $\text{CDCl}_3$ )  $\delta$  10.22 (s, 1H), 7.51 (dd,  $J = 7.0$  Hz,  $J = 2.1$  Hz, 2H), 7.34-7.25 (m, 3H), 7.07 (s, 1H), 6.88 (d,  $J = 8.6$  Hz, 1H), 6.47 (d,  $J = 8.6$  Hz, 1H), 4.12 (s, 5H), 4.06 (d,  $J = 1.0$  Hz, 1H), 3.94 (dd,  $J = 10.0$  Hz,  $J = 8.2$  Hz,

2H), 3.88-3.85 (m, 1H), 3.56 (d,  $J = 1.0$  Hz, 1H), 3.52 (dd,  $J = 10.5$  Hz,  $J = 5.7$  Hz, 1H), 1.50 (d,  $J = 1.6$  Hz, 1H), 0.70 (dd,  $J = 10.4$  Hz,  $J = 6.7$  Hz, 6H);  $^{13}\text{C}$  NMR (101 MHz,  $\text{CDCl}_3$ )  $\delta$  168.2, 154.3, 142.9, 138.3, 134.3, 128.1, 127.5, 125.2, 113.8, 109.0, 107.6, 102.3, 101.2, 70.5, 67.6, 63.7, 62.1, 60.7, 55.9, 26.2, 18.2, 17.9. HRMS (ESI-TOF)  $m/z$ :  $[\text{M}]^+$  calcd for  $\text{C}_{28}\text{H}_{27}\text{FeNO}_4$  497.1284; found 497.1280.

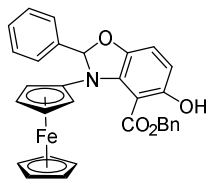

**benzyl 3-ferrocenyl-5-hydroxy-2-phenyl-2,3-dihydrobenzo[d]oxazole-4-carboxylate (3f).** Orange oil. 11.2 mg, 42% yield.  $^1\text{H}$  NMR (400 MHz,  $\text{CDCl}_3$ )  $\delta$  9.98 (s, 1H), 7.34-7.26 (m, 4H), 7.26-7.19 (m, 4H), 7.17-7.14 (m, 1H), 7.03 (dd,  $J = 7.6$  Hz,  $J = 1.4$  Hz, 2H), 7.00 (s, 1H), 6.86 (d,  $J = 8.6$  Hz, 1H), 6.44 (d,  $J = 8.6$  Hz, 1H), 5.22 (s, 1H), 4.64 (d,  $J = 11.8$  Hz, 1H), 4.10 (s, 5H), 3.90 (dd,  $J = 3.8$ , 2.5 Hz, 1H), 3.87 (dd,  $J = 3.8$  Hz,  $J = 2.4$  Hz, 1H), 3.43-3.38 (m, 1H);  $^{13}\text{C}$  NMR (101 MHz,  $\text{CDCl}_3$ )  $\delta$  167.5, 154.1, 143.0, 138.3, 134.4, 133.4, 128.0, 127.9, 127.6, 127.4, 127.3, 127.2, 126.8, 126.3, 125.1, 113.8, 108.6, 107.4, 102.0, 100.9, 67.6, 66.1, 63.8, 62.2, 60.6, 56.0. HRMS (ESI-TOF)  $m/z$ :  $[\text{M}]^+$  calcd for  $\text{C}_{31}\text{H}_{25}\text{FeNO}_4$  531.1127; found 531.1124.

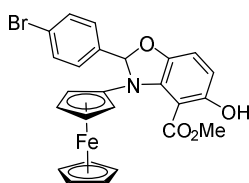

**methyl 2-(4-bromophenyl)-3-ferrocenyl-5-hydroxy-2,3-dihydrobenzo[d]oxazole-4-carboxylate (3g).** Brown solid. 13.4 mg, 50% yield. m.p. = 197.9-199.5 °C.  $^1\text{H}$  NMR (400 MHz,  $\text{CDCl}_3$ )  $\delta$  10.02 (s, 1H), 7.46 (d,  $J = 8.4$  Hz, 2H), 7.36 (d,  $J = 8.4$  Hz, 2H), 7.02 (s, 1H), 6.85 (d,  $J = 8.6$  Hz, 1H), 6.44 (d,  $J = 8.6$  Hz, 1H), 4.13 (s, 5H), 4.07-4.03 (m, 1H), 4.01-3.95 (m, 1H), 3.89 (d,  $J = 1.3$  Hz, 1H), 3.55-3.50 (m, 1H), 3.48 (s, 3H);  $^{13}\text{C}$  NMR (101 MHz,  $\text{CDCl}_3$ )  $\delta$  168.2, 154.4, 142.7, 137.4, 134.4, 131.4, 130.9, 130.0, 127.0, 122.3, 113.8, 108.6, 107.2, 101.7, 101.0, 67.7, 63.9, 62.1, 61.1, 56.1, 50.8. HRMS (ESI-TOF)  $m/z$ :  $[\text{M}]^+$  calcd for  $\text{C}_{25}\text{H}_{20}\text{BrFeNO}_4$  532.9920; found 532.9917.

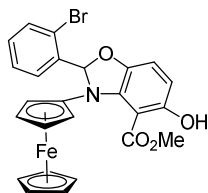

**methyl 2-(2-bromophenyl)-3-ferrocenyl-5-hydroxy-2,3-dihydrobenzo[d]oxazole-4-carboxylate (3h).** Orange solid. 18.0 mg, 68% yield. m.p. = 170.1-171.8 °C.  $^1\text{H}$  NMR (400 MHz,  $\text{CDCl}_3$ )  $\delta$  10.01 (s, 1H), 7.69 (dd,  $J = 7.4$  Hz,  $J = 1.6$  Hz, 1H), 7.61 (s, 1H), 7.48 (dd,  $J = 7.2$  Hz,  $J = 2.2$  Hz, 1H), 7.28 (dd,  $J = 5.5$  Hz,  $J = 1.9$  Hz, 2H), 6.89 (d,  $J = 8.6$  Hz, 1H), 6.49 (d,  $J = 8.6$  Hz, 1H), 4.27 (s, 5H), 4.21-4.17 (m, 1H), 4.02 (dd,  $J = 3.7$  Hz,  $J = 2.4$  Hz, 1H), 3.98-3.94 (m, 1H), 3.55 (s, 3H), 3.49-3.45 (m, 1H);  $^{13}\text{C}$  NMR (101 MHz,  $\text{CDCl}_3$ )  $\delta$  169.2, 155.1, 143.2, 137.3, 136.1, 133.3, 131.0, 128.3, 128.0, 122.8, 114.8, 109.2, 108.0, 103.0, 102.0, 68.9, 65.0, 63.0, 62.4, 57.6, 51.8. HRMS (ESI-TOF)  $m/z$ :  $[\text{M}]^+$  calcd for  $\text{C}_{25}\text{H}_{20}\text{BrFeNO}_4$  532.9920; found 532.9912.

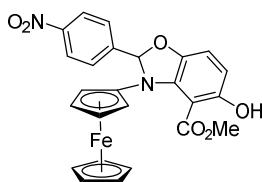

**methyl 3-ferrocenyl-5-hydroxy-2-(4-nitrophenyl)-2,3-dihydrobenzo[d]oxazole-4-carboxylate (3i).** Brown solid. 11.7 mg, 47% yield. m.p. = 180.2-182.0 °C.  $^1\text{H}$  NMR (400 MHz,  $\text{CDCl}_3$ )  $\delta$  10.11 (s, 1H), 8.23-8.15 (m, 2H), 7.68 (d,  $J = 8.6$  Hz, 2H), 7.11 (s, 1H), 6.91 (d,  $J = 8.6$  Hz, 1H), 6.49 (d,  $J = 8.6$  Hz, 1H), 4.14 (s, 5H), 4.05-4.04 (m, 1H), 4.02-4.00 (m, 1H), 3.92-3.91 (m, 1H), 3.58-3.56 (m, 1H), 3.52 (s, 3H);  $^{13}\text{C}$  NMR (101 MHz,  $\text{CDCl}_3$ )  $\delta$  168.0, 154.7, 147.4, 145.3, 142.5, 133.9, 129.5, 126.3, 123.3, 122.9, 114.2, 109.5, 107.5, 102.2, 100.3, 67.8, 64.0, 62.3, 61.1, 55.9, 50.9. HRMS (ESI-TOF)  $m/z$ :  $[\text{M}]^+$  calcd for  $\text{C}_{25}\text{H}_{20}\text{FeN}_2\text{O}_6$  500.0665; found 500.0653.

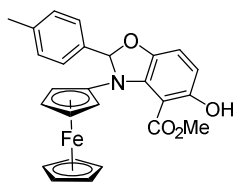

**methyl 3-ferrocenyl-5-hydroxy-2-(p-tolyl)-2,3-dihydrobenzo[d]oxazole-4-carboxylate (3j).** Orange oil. 12.3 mg, 52% yield.  $^1\text{H}$  NMR (400 MHz,  $\text{CDCl}_3$ )  $\delta$  10.00 (s, 1H), 7.36 (d,  $J$  = 8.0 Hz, 2H), 7.14 (d,  $J$  = 7.9 Hz, 2H), 7.06 (s, 1H), 6.82 (d,  $J$  = 8.5 Hz, 1H), 6.41 (d,  $J$  = 8.5 Hz, 1H), 4.13 (s, 5H), 4.09-4.05 (m, 1H), 3.96 (d,  $J$  = 1.3 Hz, 1H), 3.88 (d,  $J$  = 1.3 Hz, 1H), 3.54-3.50 (m, 1H), 3.46 (s, 3H), 2.29 (s, 3H);  $^{13}\text{C}$  NMR (101 MHz,  $\text{CDCl}_3$ )  $\delta$  168.3, 154.0, 142.9, 138.2, 135.4, 134.9, 128.4, 125.1, 113.4, 107.9, 107.1, 101.8, 101.3, 67.7, 63.8, 62.0, 61.1, 56.2, 50.7, 20.2. HRMS (ESI-TOF)  $m/z$ :  $[\text{M}]^+$  calcd for  $\text{C}_{26}\text{H}_{23}\text{FeNO}_4$  469.0971; found 469.0972.

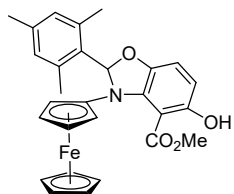

**methyl 3-ferrocenyl-5-hydroxy-2-mesityl-2,3-dihydrobenzo[d]oxazole-4-carboxylate (3k).** Yellow solid. 16.4 mg, 66% yield. m.p. = 166.1-167.8 °C.  $^1\text{H}$  NMR (400 MHz,  $\text{CDCl}_3$ )  $\delta$  9.79 (s, 1H), 7.60 (s, 1H), 6.82 (s, 2H), 6.75 (d,  $J$  = 8.5 Hz, 1H), 6.38 (d,  $J$  = 8.5 Hz, 1H), 4.19-4.11 (m, 6H), 3.94-3.86 (m, 2H), 3.42 (s, 3H), 3.23-3.18 (m, 1H), 2.38 (s, 6H), 2.22 (s, 3H);  $^{13}\text{C}$  NMR (101 MHz,  $\text{CDCl}_3$ )  $\delta$  168.4, 153.2, 144.2, 138.0, 136.6, 135.1, 130.4, 129.7, 111.7, 106.9, 106.5, 101.1, 100.8, 67.5, 63.7, 61.6, 60.6, 56.3, 50.5, 19.9, 19.5. HRMS (ESI-TOF)  $m/z$ :  $[\text{M}]^+$  calcd for  $\text{C}_{28}\text{H}_{27}\text{FeNO}_4$  497.1284; found 497.1282.

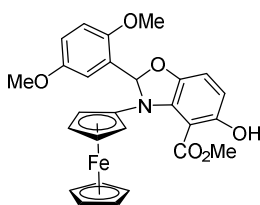

**methyl 3-ferrocenyl-5-hydroxy-2-(2,5-dimethoxyphenyl)-2,3-dihydrobenzo[d]oxazole-4-carboxylate (3l).** Orange solid. 16.8 mg, 65% yield. m.p. = 93.7-95.5 °C.  $^1\text{H}$  NMR (400 MHz,  $\text{CDCl}_3$ )  $\delta$  9.87 (s, 1H), 7.49 (s, 1H), 6.95 (d,  $J$  = 3.0 Hz, 1H), 6.87 (d,  $J$  = 8.9 Hz, 1H), 6.84-6.81 (m, 1H), 6.79 (s, 1H), 6.38 (d,  $J$  = 8.5 Hz, 1H), 4.15 (s, 5H), 4.12-4.09 (m, 1H), 3.95-3.92 (m, 1H), 3.91 (s, 3H), 3.87 (dd,  $J$  = 3.7 Hz,  $J$  = 2.4 Hz, 1H), 3.61 (s, 3H), 3.49-3.46 (m, 1H), 3.45 (s, 3H);  $^{13}\text{C}$  NMR (101 MHz,  $\text{CDCl}_3$ )  $\delta$  168.3, 153.7, 152.7, 150.4, 142.8, 135.2, 126.6, 114.0, 113.3, 112.4, 111.2, 107.5, 106.7, 100.8, 98.1, 67.8, 63.8, 62.0, 61.2, 56.7, 55.5, 54.5, 50.7. HRMS (ESI-TOF)  $m/z$ :  $[\text{M}]^+$  calcd for  $\text{C}_{27}\text{H}_{25}\text{FeNO}_6$  515.1026; found 515.1019.

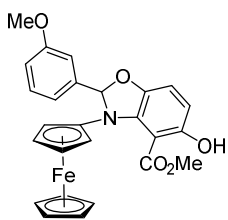

**methyl 3-ferrocenyl-5-hydroxy-2-(3-methoxyphenyl)-2,3-dihydrobenzo[d]oxazole-4-carboxylate (3m).** Orange solid. 18.3 mg, 75% yield. m.p. = 108.6-110.4 °C.  $^1\text{H}$  NMR (400 MHz,  $\text{CDCl}_3$ )  $\delta$  9.99 (s, 1H), 7.25 (t,  $J$  = 7.9 Hz, 1H), 7.08 (d,  $J$  = 7.7 Hz, 1H), 7.05 (s, 1H), 7.03 (s, 1H), 6.84 (dd,  $J$  = 8.3 Hz,  $J$  = 2.9 Hz, 2H), 6.42 (d,  $J$  = 8.6 Hz, 1H), 4.12 (d,  $J$  = 3.8 Hz, 5H), 4.06 (dd,  $J$  = 2.4 Hz,  $J$  = 1.3 Hz, 1H), 3.98-3.95 (m, 1H), 3.90-3.86 (m, 1H), 3.73 (s, 3H), 3.57-3.54 (m, 1H), 3.47 (s, 3H);  $^{13}\text{C}$  NMR (101 MHz,  $\text{CDCl}_3$ )  $\delta$  169.3, 159.9, 155.2, 143.9, 140.9, 135.7, 129.9, 118.5, 114.6, 111.8, 109.2, 108.2, 102.5, 68.7, 64.9, 63.1, 62.1, 57.2, 55.2, 51.7. HRMS (ESI-TOF)  $m/z$ :  $[\text{M}]^+$  calcd for  $\text{C}_{26}\text{H}_{23}\text{FeNO}_5$  485.0920; found 485.0914.

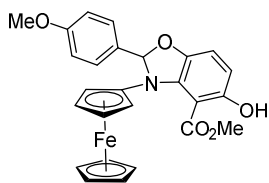

**methyl 3-ferrocenyl-5-hydroxy-2-(4-methoxyphenyl)-2,3-dihydrobenzo[d]oxazole-4-carboxylate (3n).** Orange oil. 15.7 mg, 65% yield.  $^1\text{H}$  NMR (400 MHz,  $\text{CDCl}_3$ )  $\delta$  10.06 (s, 1H), 7.47 (d,  $J$  = 8.6 Hz, 2H), 7.12 (s, 1H), 6.93 (d,  $J$  = 8.7 Hz, 2H), 6.89 (d,  $J$  = 8.5 Hz, 1H), 6.48 (d,  $J$  = 8.5 Hz, 1H), 4.21 (s, 5H), 4.14 (s, 1H), 4.04 (s, 1H), 3.95 (d,  $J$  = 1.2 Hz, 1H), 3.81 (s, 3H), 3.58 (d,  $J$  = 1.0 Hz, 1H), 3.54 (s, 3H);  $^{13}\text{C}$  NMR (101 MHz,  $\text{CDCl}_3$ )  $\delta$  169.4, 160.4, 155.0, 143.9, 138.4, 135.9, 131.5, 128.1, 127.6, 114.4, 114.1, 108.9, 108.0, 102.7, 102.2, 68.7, 64.8, 63.0, 62.1, 57.2, 55.4, 51.8. HRMS (ESI-TOF)  $m/z$ :  $[\text{M}]^+$  calcd for  $\text{C}_{26}\text{H}_{23}\text{FeNO}_5$  485.0920; found 485.0913.

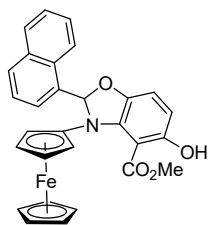

**benzyl 3-ferrocenyl-5-hydroxy-2-(naphthalen-1-yl)-2,3-dihydrobenzo[d]oxazole-4-carboxylate (3o).** Orange solid. 23.2 mg, 92% yield. m.p. = 129.6-131.3 °C.  $^1\text{H}$  NMR (400 MHz,  $\text{CDCl}_3$ )  $\delta$  9.97 (s, 1H), 8.33 (d,  $J$  = 8.4 Hz, 1H), 7.87 (d,  $J$  = 7.7 Hz, 2H), 7.81 (d,  $J$  = 8.2 Hz, 1H), 7.65 (dd,  $J$  = 12.6 Hz,  $J$  = 4.0 Hz, 2H), 7.53 (t,  $J$  = 7.5 Hz, 1H), 7.40-7.32 (m, 1H), 6.76 (d,  $J$  = 8.5 Hz, 1H), 6.39 (d,  $J$  = 8.5 Hz, 1H), 4.20-4.18 (m, 1H), 4.17 (s, 5H), 3.94-3.88 (m, 2H), 3.55 (s, 3H), 3.44-3.41 (m, 1H);  $^{13}\text{C}$  NMR (101 MHz,  $\text{CDCl}_3$ )  $\delta$  168.3, 154.0, 142.8, 135.0, 133.1, 132.5, 129.9, 129.0, 127.9, 125.9, 125.0, 124.4, 123.1, 122.7, 113.8, 108.1, 107.4, 101.3, 100.7, 67.8, 63.9, 62.1, 61.3, 56.4, 50.8. HRMS (ESI-TOF)  $m/z$ :  $[\text{M}]^+$  calcd for  $\text{C}_{29}\text{H}_{23}\text{FeNO}_4$  505.0971; found 505.0972.

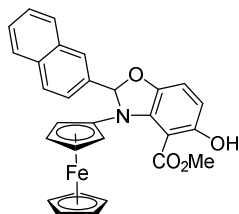

**methyl 3-ferrocenyl-5-hydroxy-2-(naphthalen-2-yl)-2,3-dihydrobenzo[d]oxazole-4-carboxylate (3p).** Orange oil. 18.5 mg, 73% yield.  $^1\text{H}$  NMR (400 MHz,  $\text{CDCl}_3$ )  $\delta$  10.02 (s, 1H), 7.93 (s, 1H), 7.82 (d,  $J$  = 8.6 Hz, 1H), 7.80-7.74 (m, 2H), 7.57 (dd,  $J$  = 8.5 Hz,  $J$  = 1.6 Hz, 1H), 7.43 (dd,  $J$  = 6.2 Hz,  $J$  = 3.2 Hz, 2H), 7.24 (s, 1H), 6.86 (d,  $J$  = 8.5 Hz, 1H), 6.43 (d,  $J$  = 8.6 Hz, 1H), 4.17 (s, 5H), 4.11-4.10 (m, 1H), 3.98-3.96 (m, 1H), 3.91-3.90 (m, 1H), 3.58-3.57 (m, 1H), 3.50 (s, 3H);  $^{13}\text{C}$  NMR (101 MHz,  $\text{CDCl}_3$ )  $\delta$  168.3, 154.1, 143.0, 135.5, 134.8, 132.7, 131.9, 127.8, 127.4, 126.7, 125.6, 125.4, 124.5, 122.8, 113.5, 108.1, 107.1, 102.0, 101.4, 67.7, 63.9, 62.0, 61.1, 56.3, 50.8. HRMS (ESI-TOF)  $m/z$ :  $[\text{M}]^+$  calcd for  $\text{C}_{29}\text{H}_{23}\text{FeNO}_4$  505.0971; found 505.0973.

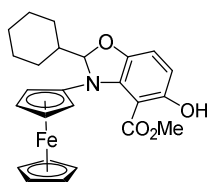

**methyl 2-cyclohexyl-3-ferrocenyl-5-hydroxy-2,3-dihydrobenzo[d]oxazole-4-carboxylate (3q).** Orange oil. 4.5 mg, 19% yield.  $^1\text{H}$  NMR (400 MHz,  $\text{CDCl}_3$ )  $\delta$  10.13 (s, 1H), 6.85 (d,  $J$  = 8.5 Hz, 1H), 6.45 (d,  $J$  = 8.5 Hz, 1H), 5.79 (d,  $J$  = 6.2 Hz, 1H), 4.05 (s, 5H), 3.95 (d,  $J$  = 1.2 Hz, 1H), 3.89 (d,  $J$  = 1.0 Hz, 1H), 3.81 (d,  $J$  = 1.2 Hz, 1H), 3.60 (s, 1H), 3.47 (s, 3H), 1.76-1.55 (m, 6H), 1.16-1.03 (m, 5H);  $^{13}\text{C}$  NMR (101 MHz,  $\text{CDCl}_3$ )  $\delta$  168.5, 153.9, 144.3, 135.5, 113.1, 108.5, 108.4, 106.4, 102.3, 67.6, 63.6, 61.9, 60.8, 56.1, 50.7, 42.4, 26.7, 26.3, 25.3, 24.8, 24.6. HRMS (ESI-TOF)  $m/z$ :  $[\text{M}]^+$  calcd for  $\text{C}_{25}\text{H}_{27}\text{FeNO}_4$  461.1284; found 461.1284.

## 5. NMR Spectra for compounds **3**

### $^1\text{H}$ NMR of **3a**

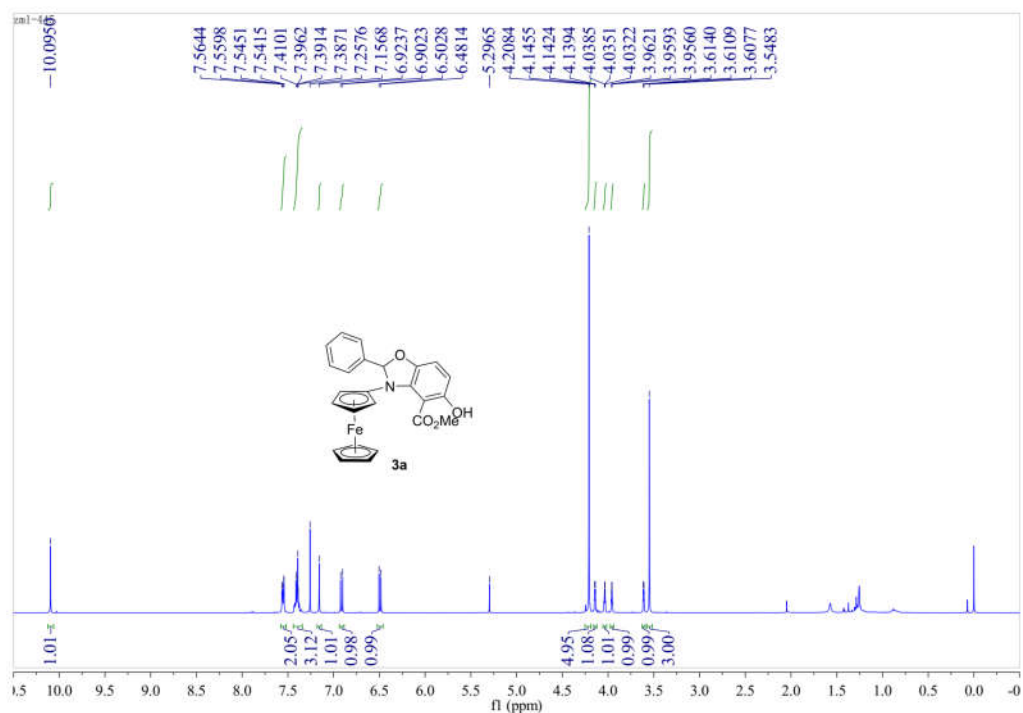

### $^{13}\text{C}$ NMR of **3a**

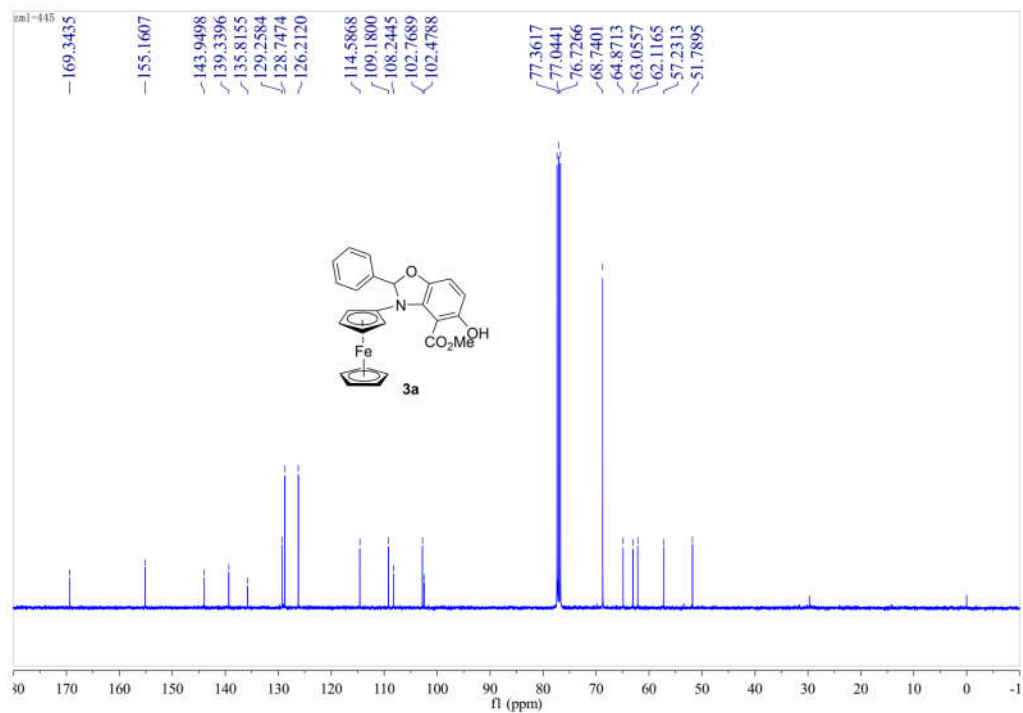

<sup>1</sup>H NMR of **3b**

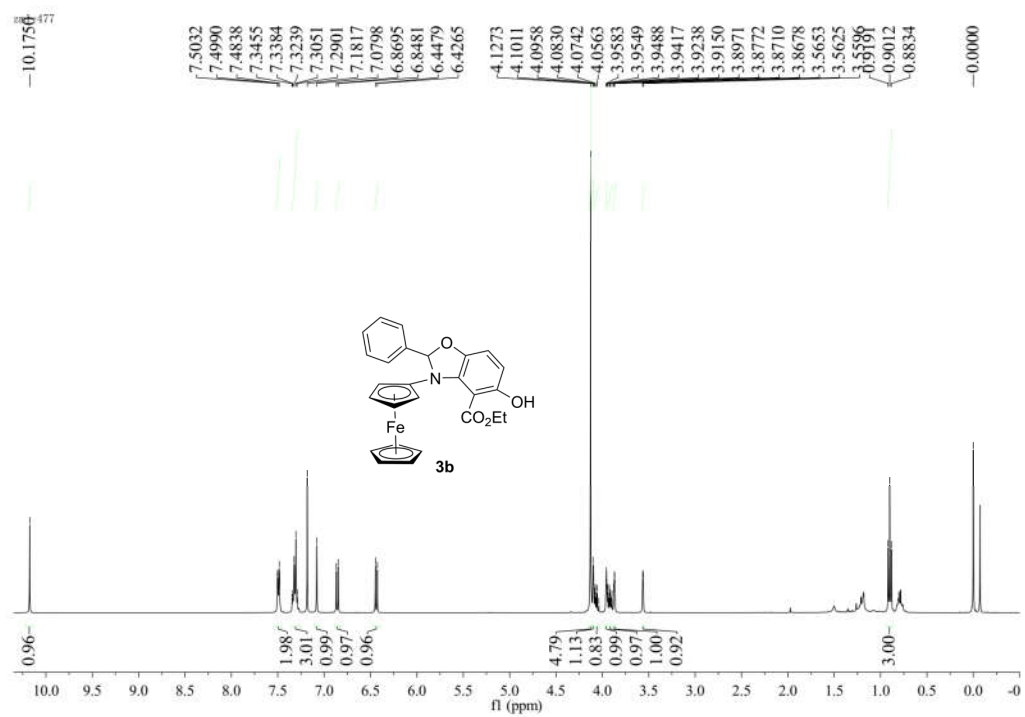

<sup>13</sup>C NMR of **3b**

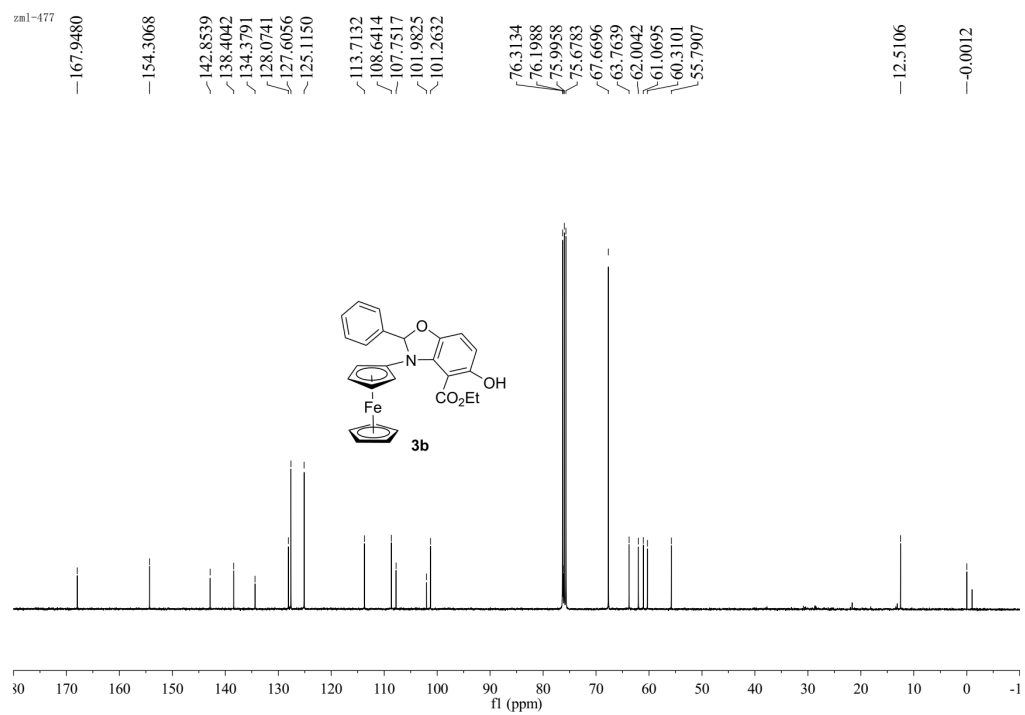



<sup>1</sup>H NMR of **3c**

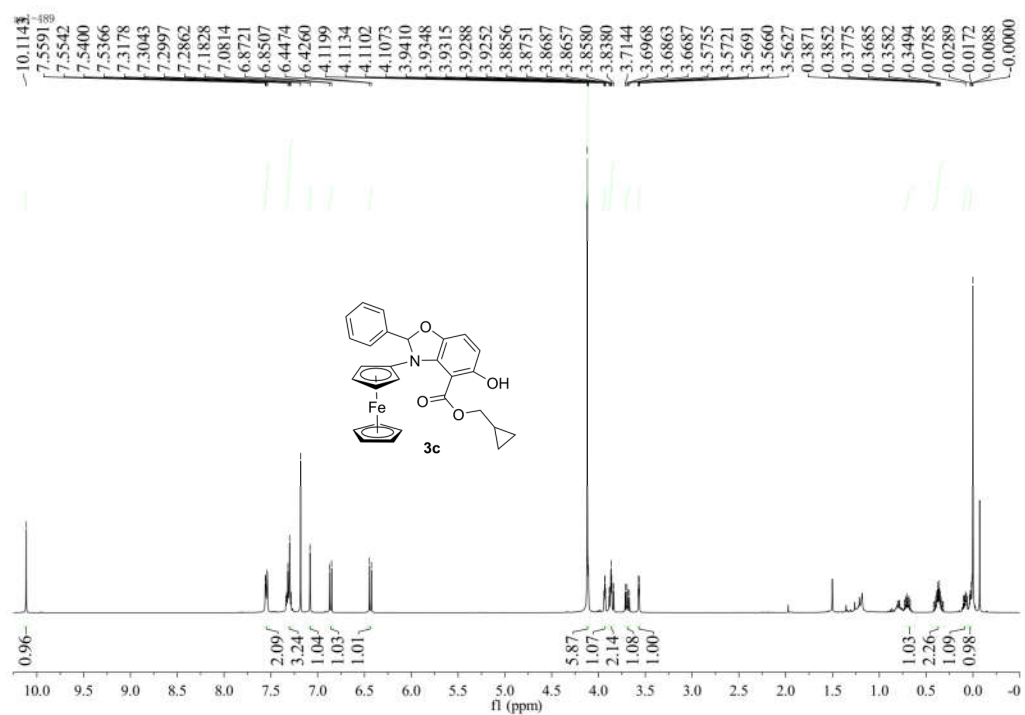

<sup>13</sup>C NMR of **3c**

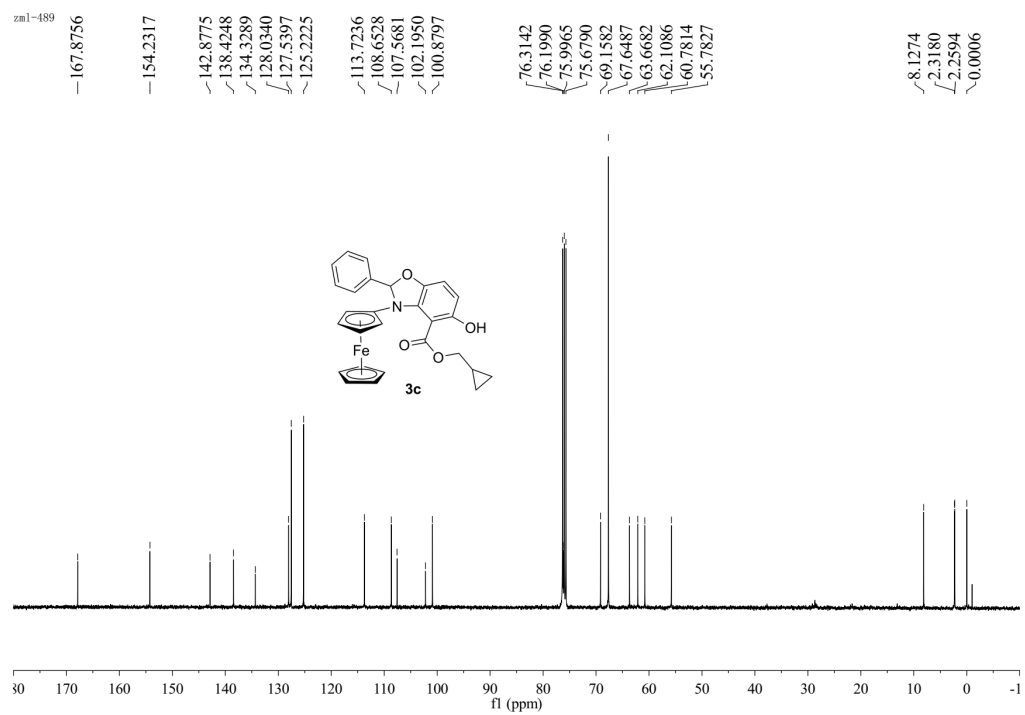

<sup>1</sup>H NMR of **3d**

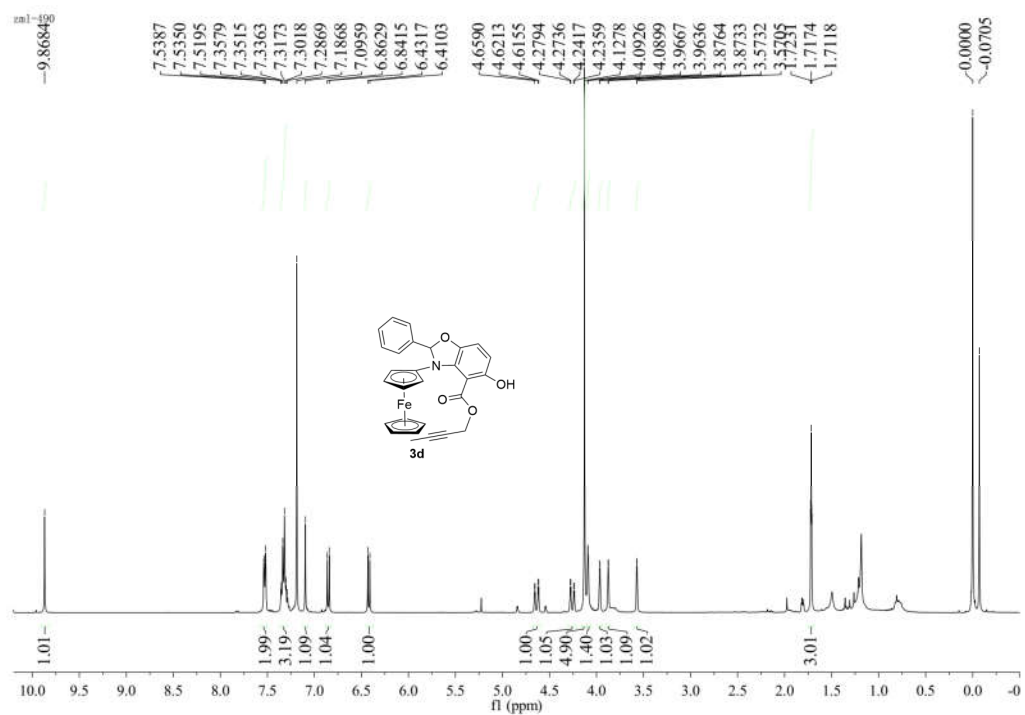

<sup>13</sup>C NMR of **3d**

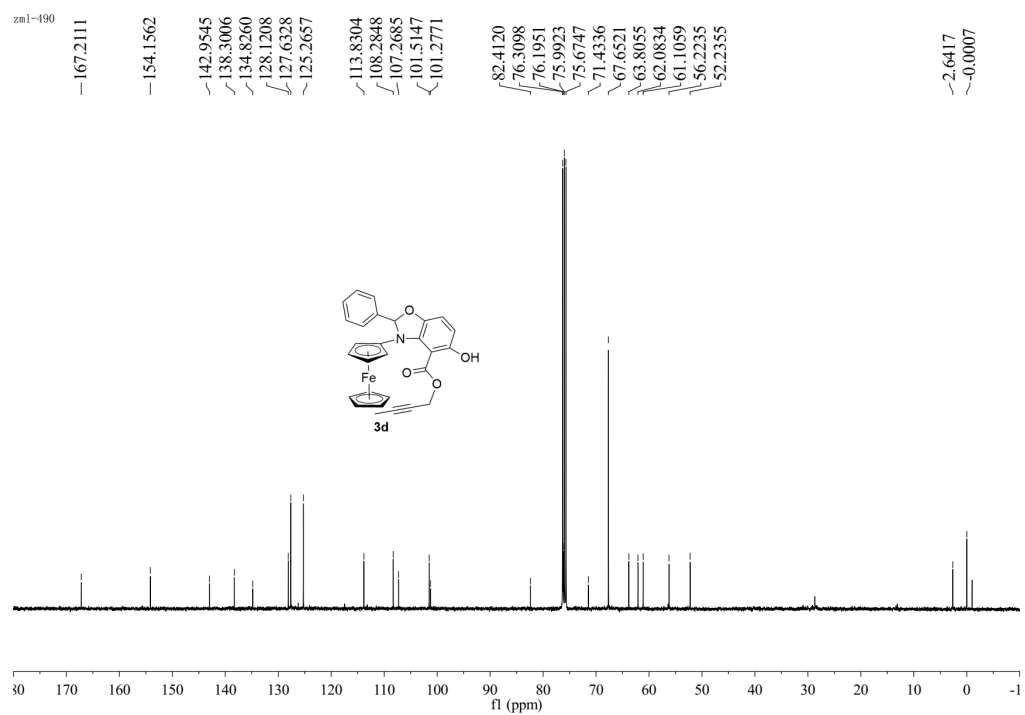

<sup>1</sup>H NMR of **3e**

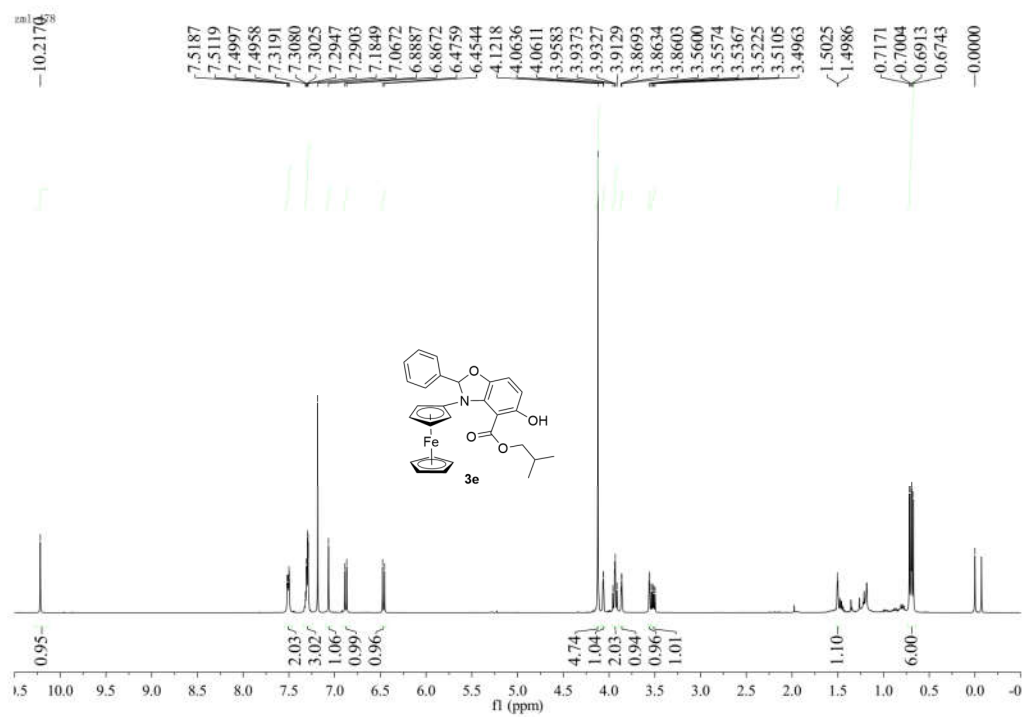

<sup>13</sup>C NMR of **3e**

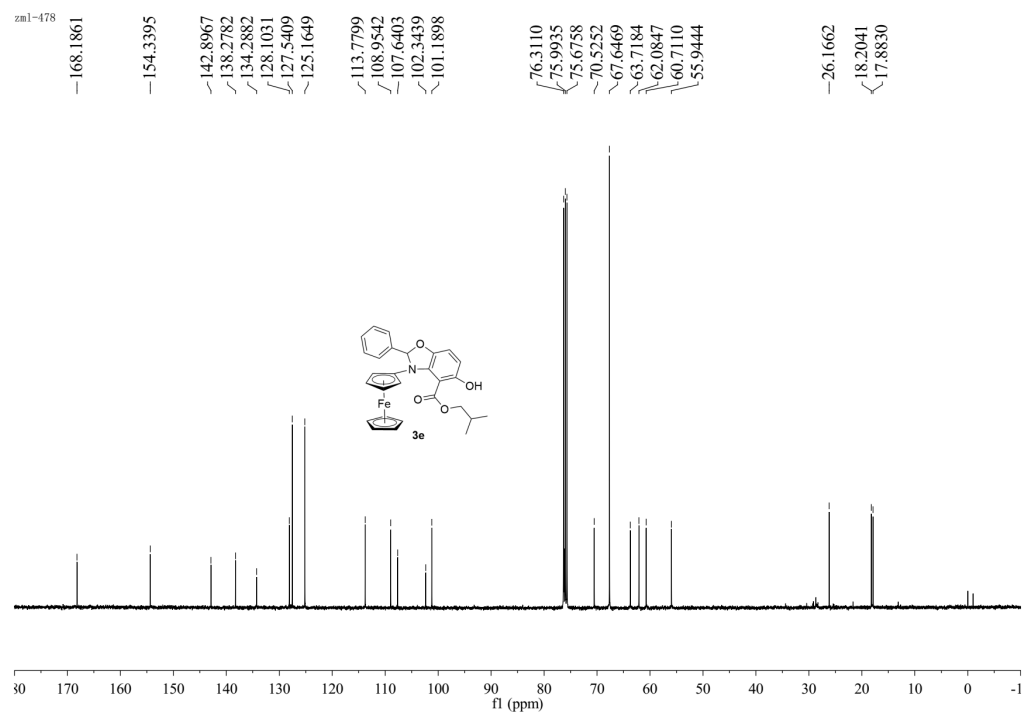

<sup>1</sup>H NMR of **3f**

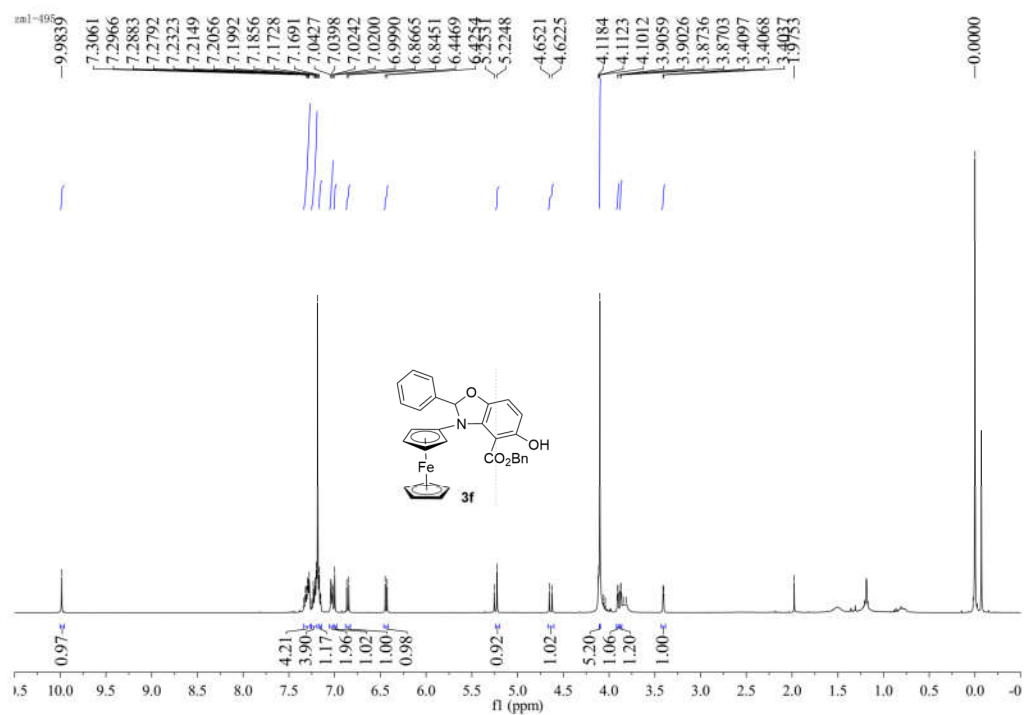

<sup>13</sup>C NMR of **3f**

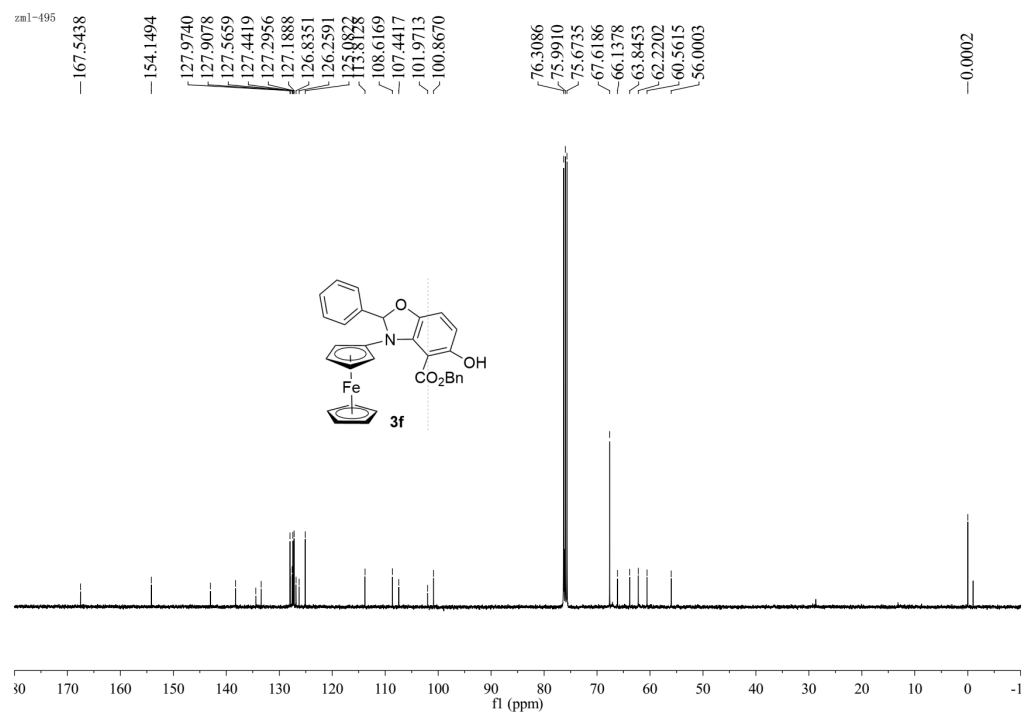

<sup>1</sup>H NMR of **3g**

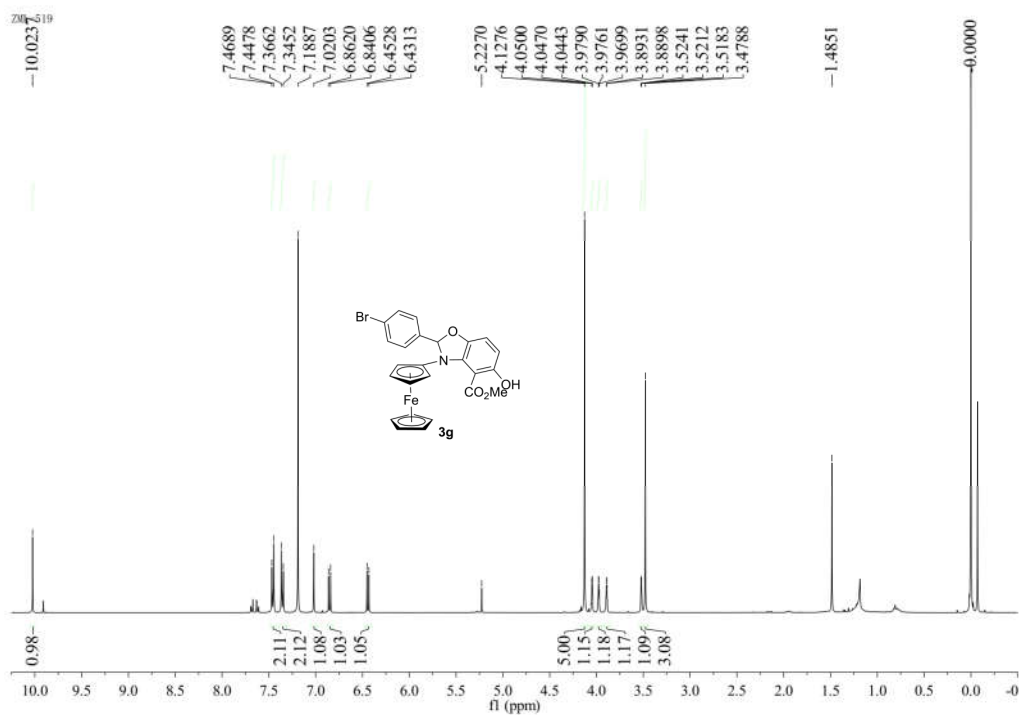

<sup>13</sup>C NMR of **3g**

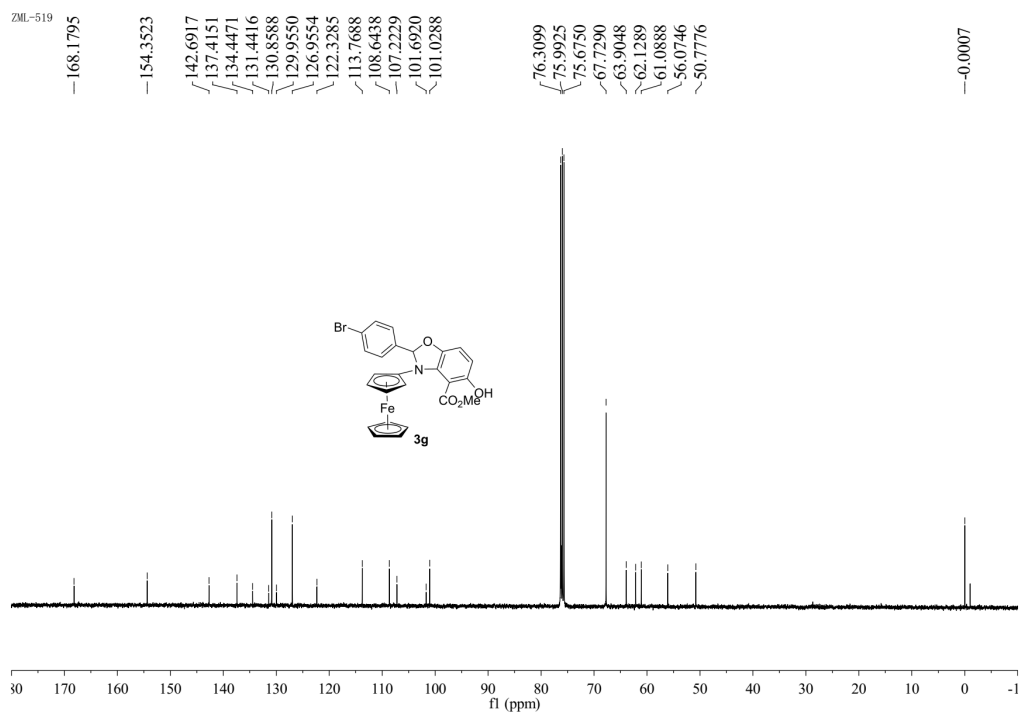

<sup>1</sup>H NMR of **3h**

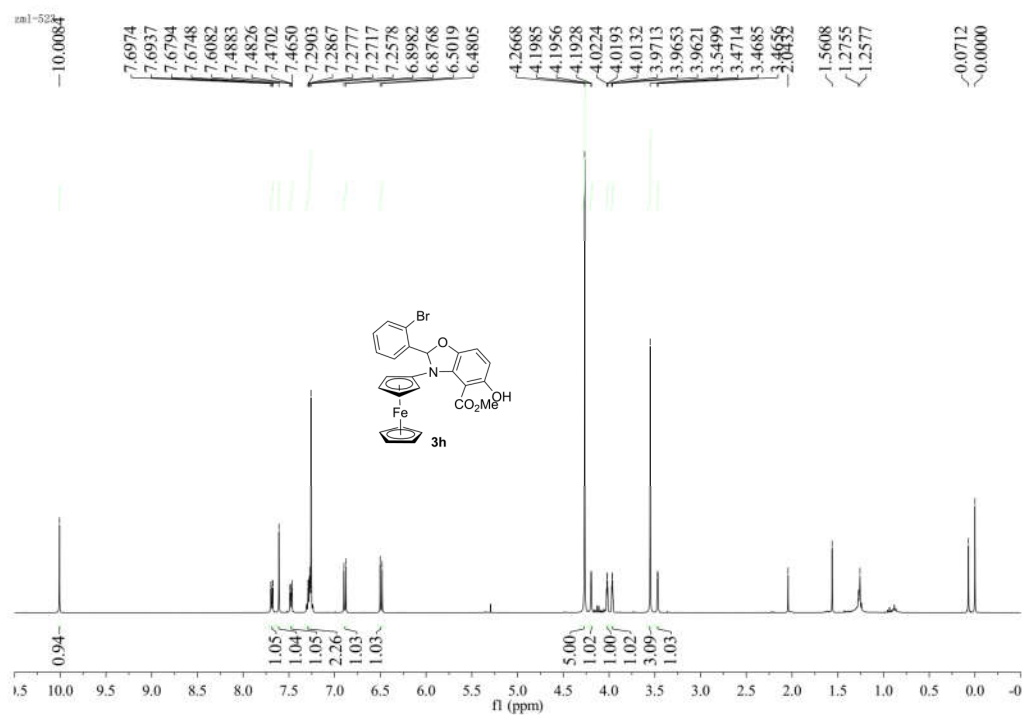

<sup>13</sup>C NMR of **3h**

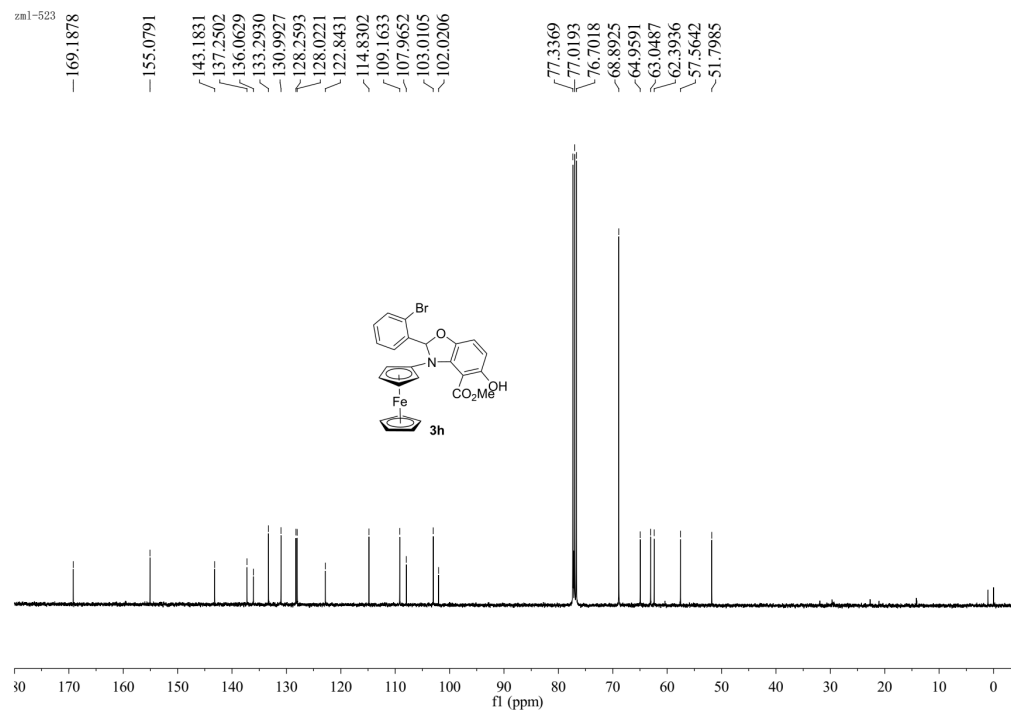

<sup>1</sup>H NMR of **3i**

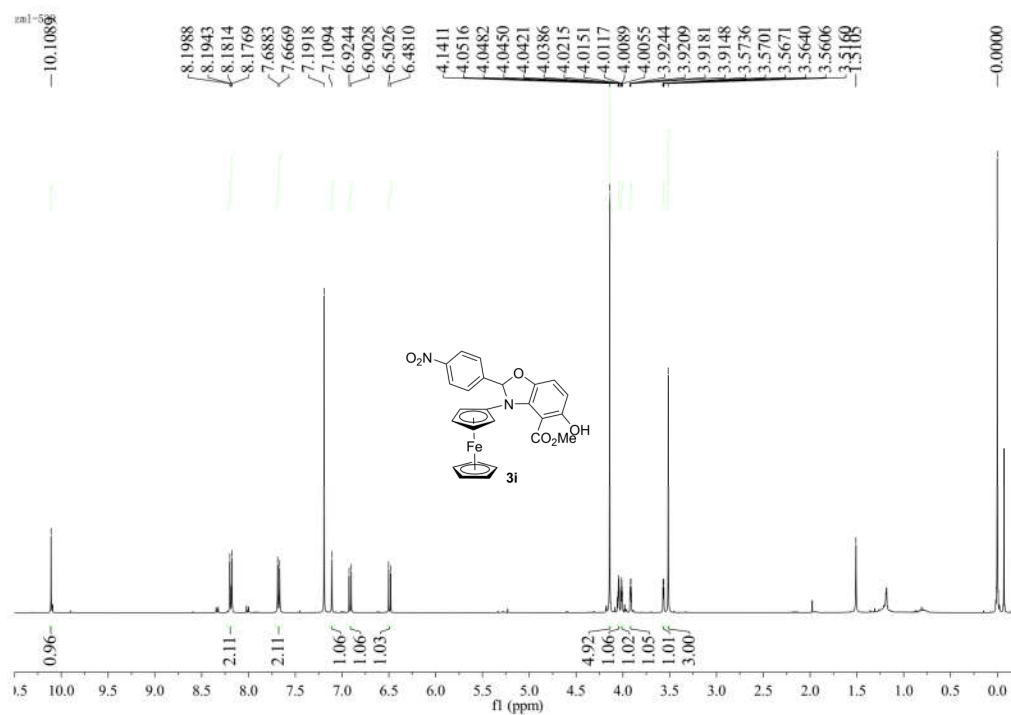

<sup>13</sup>C NMR of **3i**

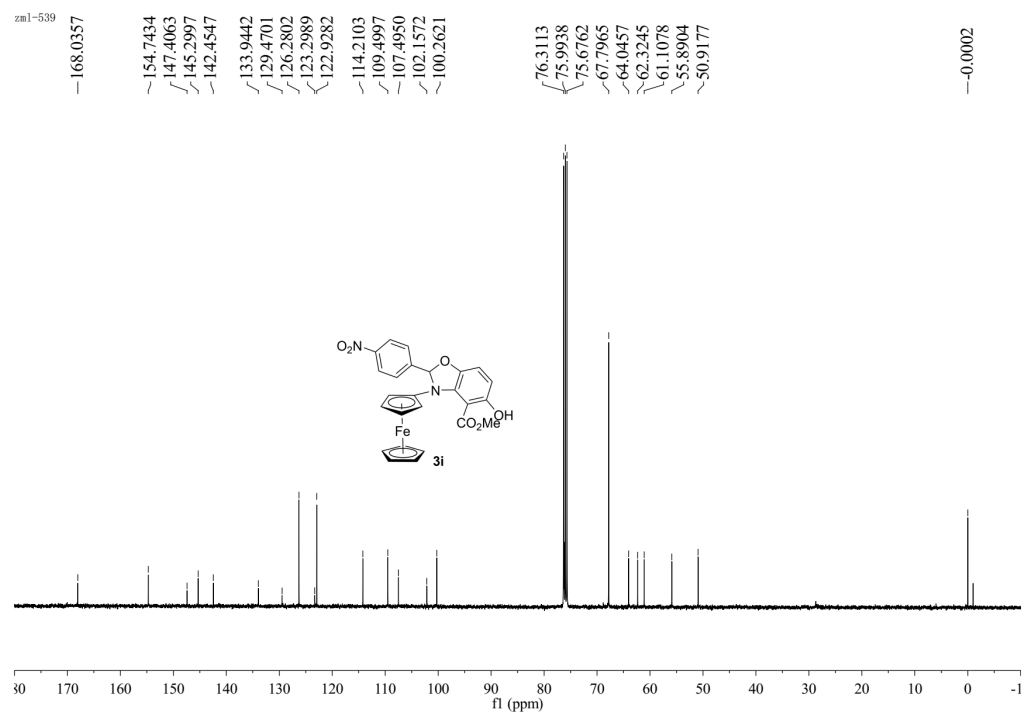

<sup>1</sup>H NMR of **3j**

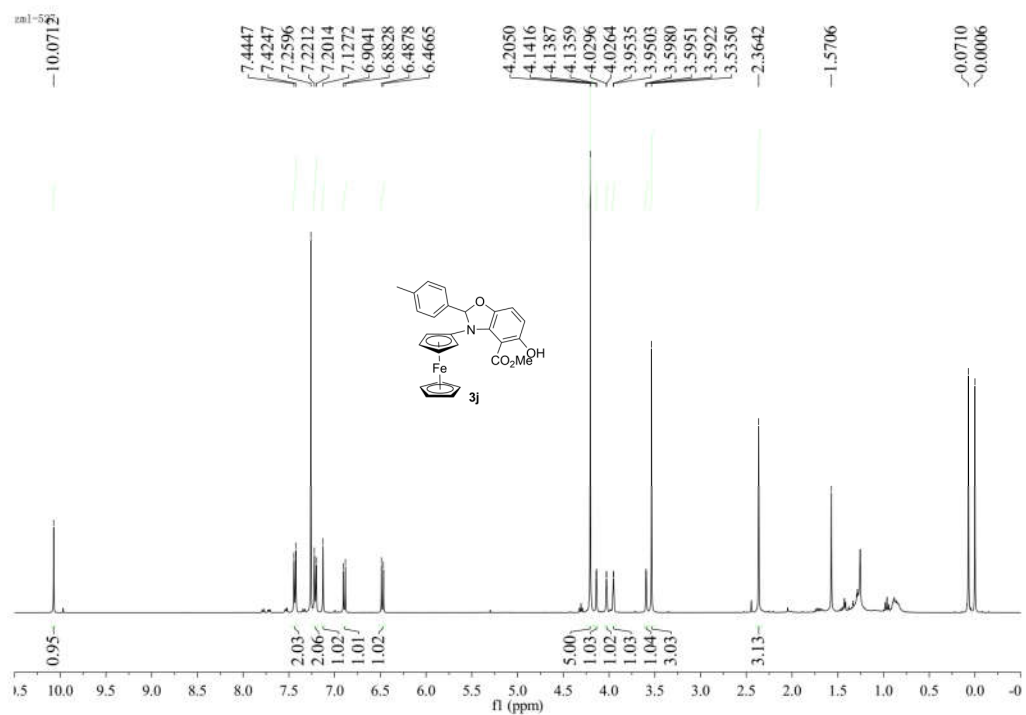

<sup>13</sup>C NMR of **3j**

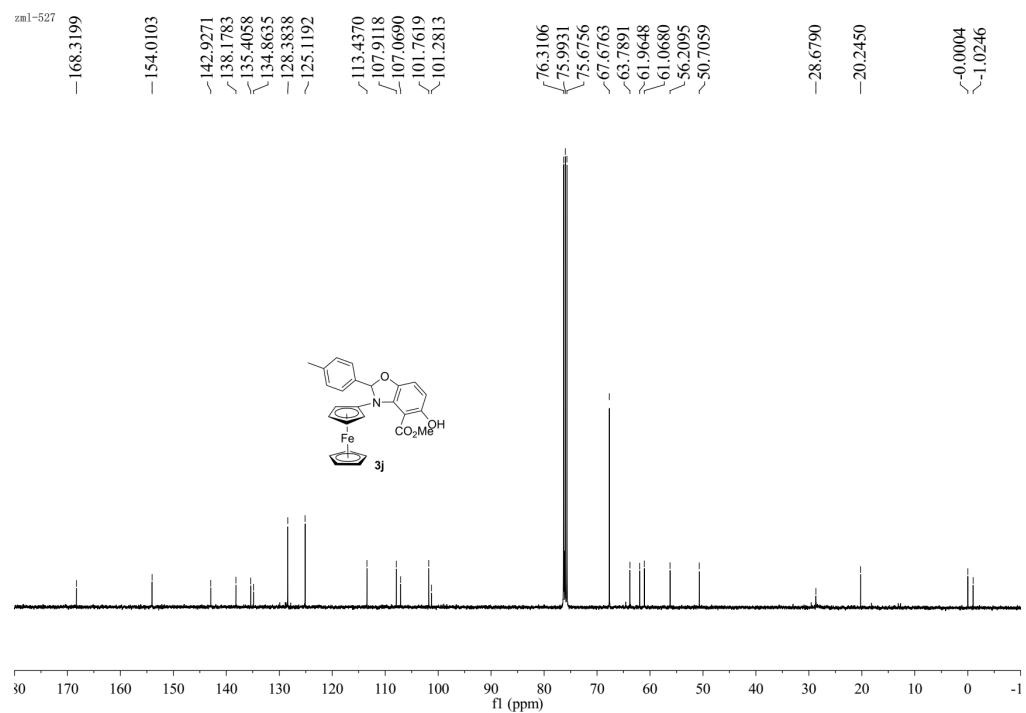



<sup>1</sup>H NMR of **3k**

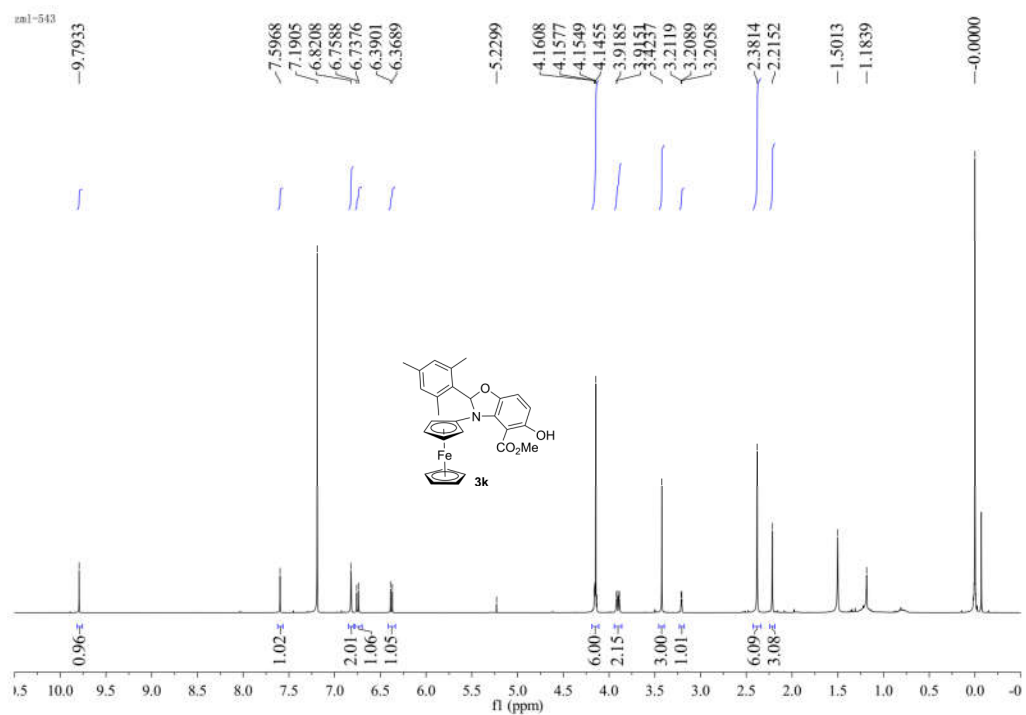

<sup>13</sup>C NMR of **3k**

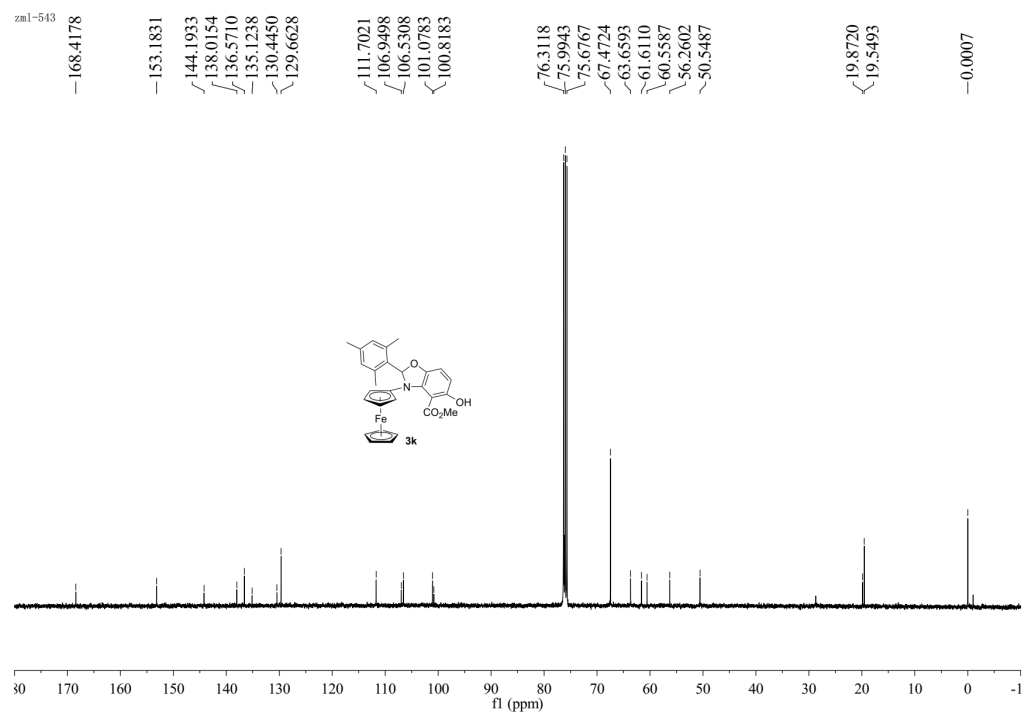

<sup>1</sup>H NMR of **31**

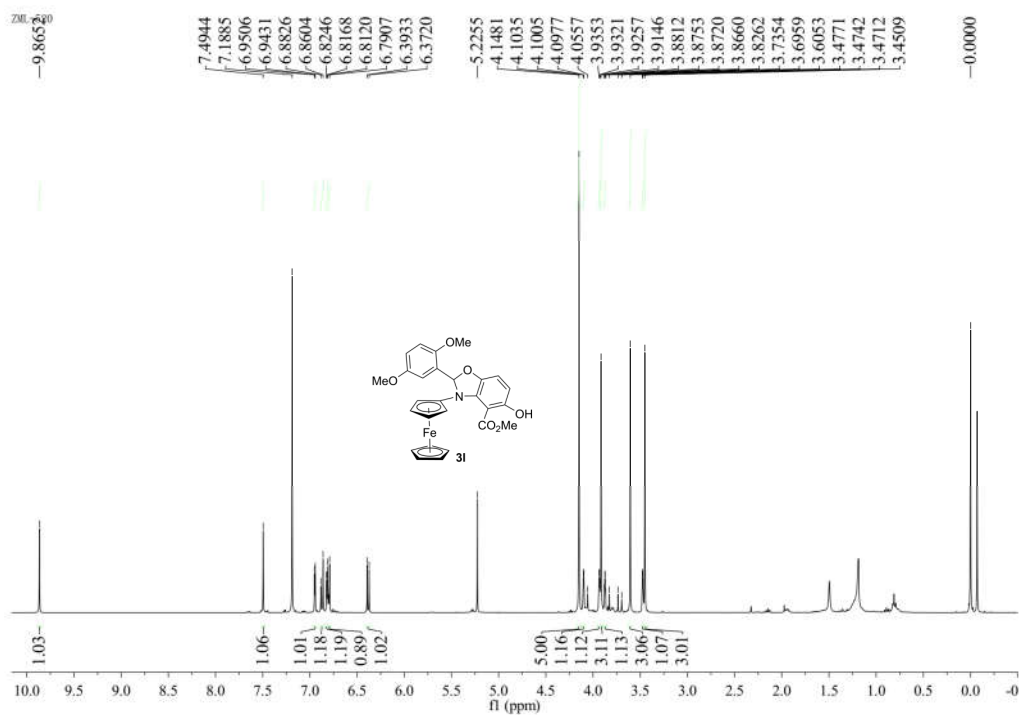

<sup>13</sup>C NMR of **31**

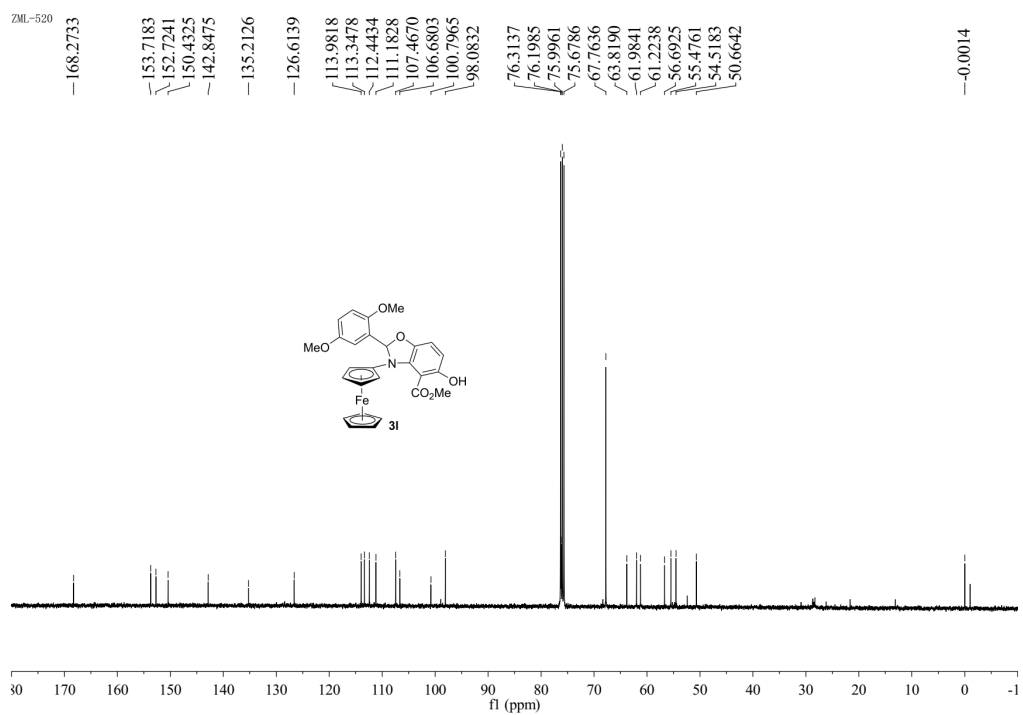

<sup>1</sup>H NMR of **3m**

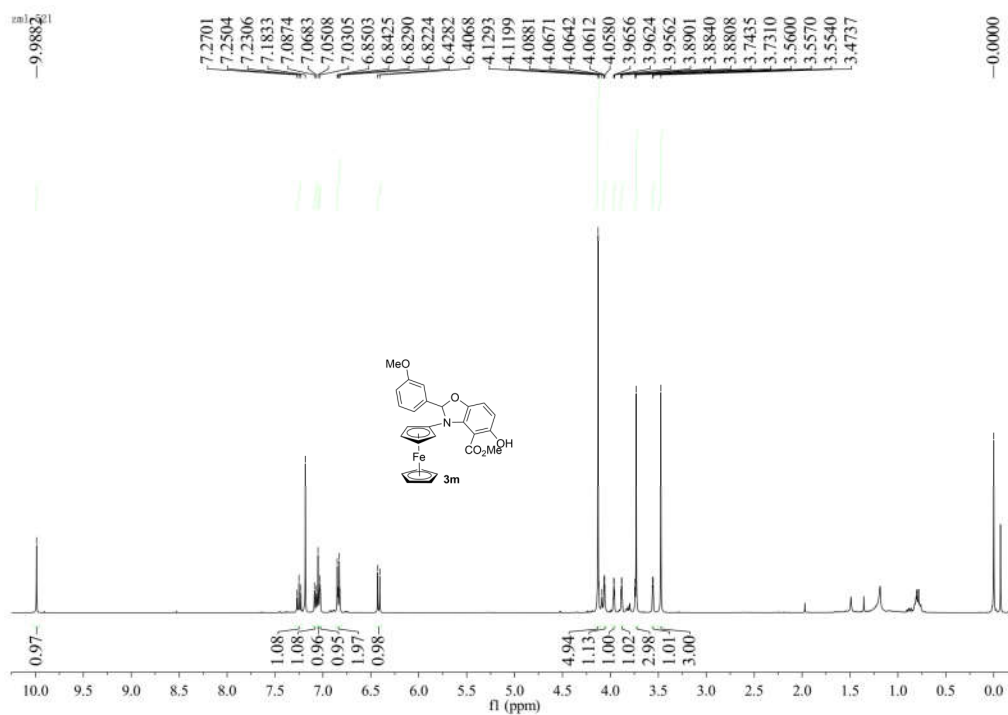

<sup>13</sup>C NMR of **3m**

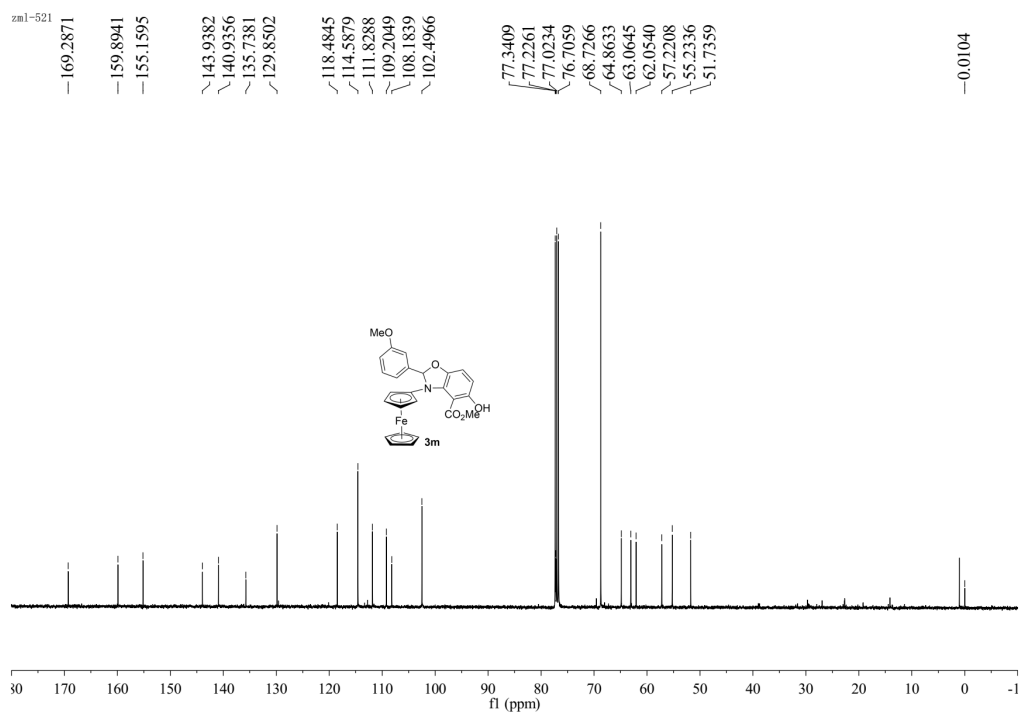

<sup>1</sup>H NMR of **3n**

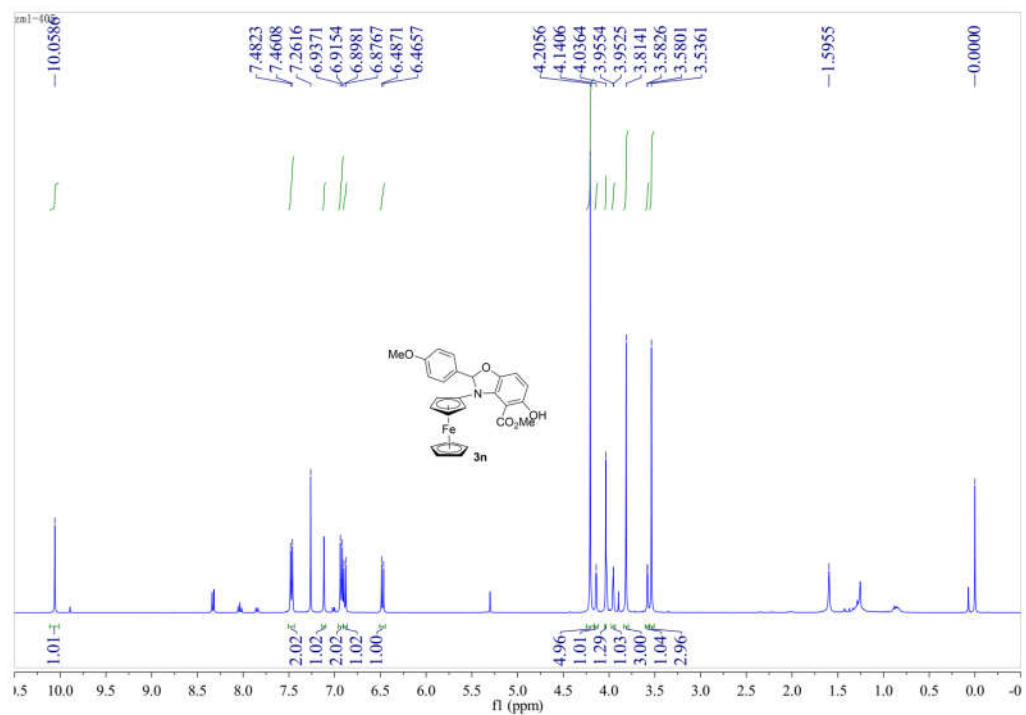

<sup>13</sup>C NMR of **3n**

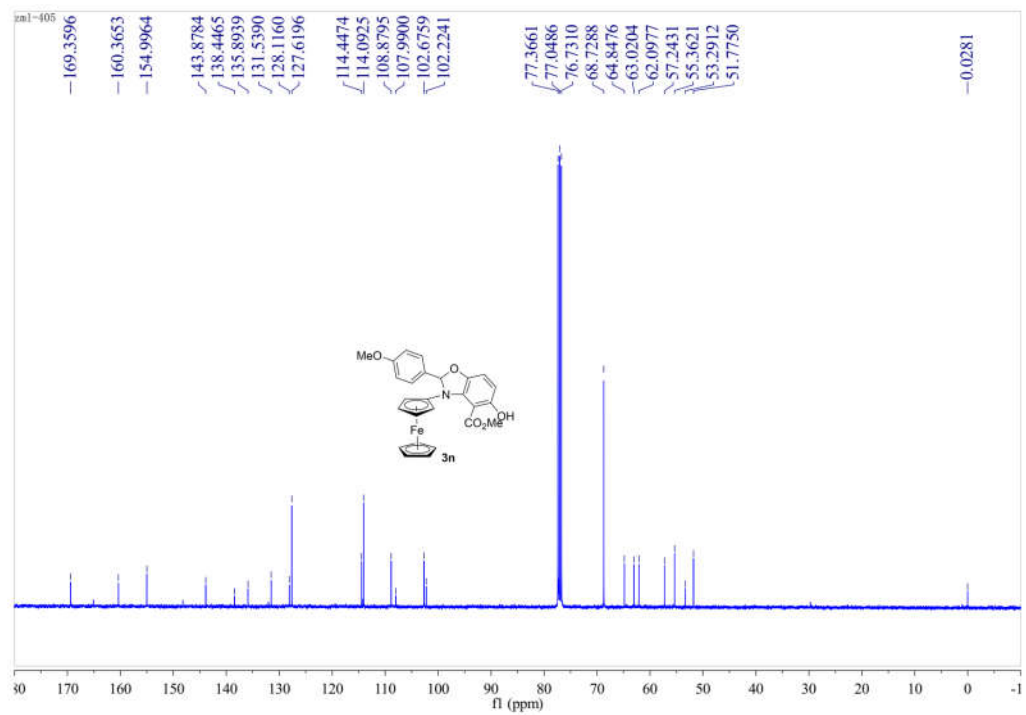

<sup>1</sup>H NMR of **3o**

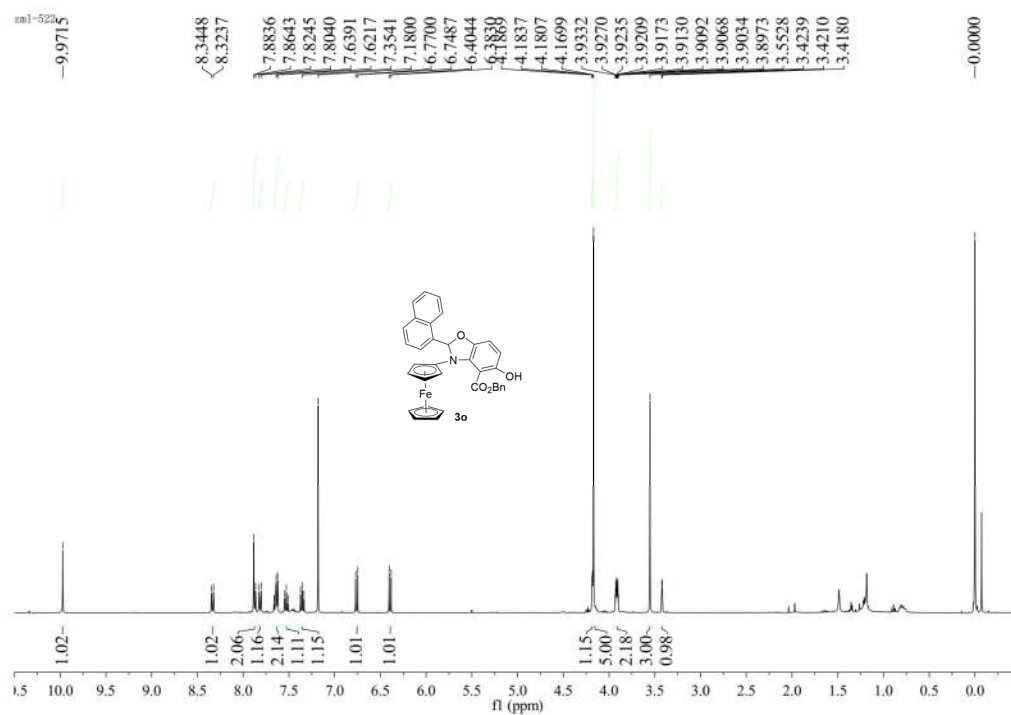

<sup>13</sup>C NMR of **3o**

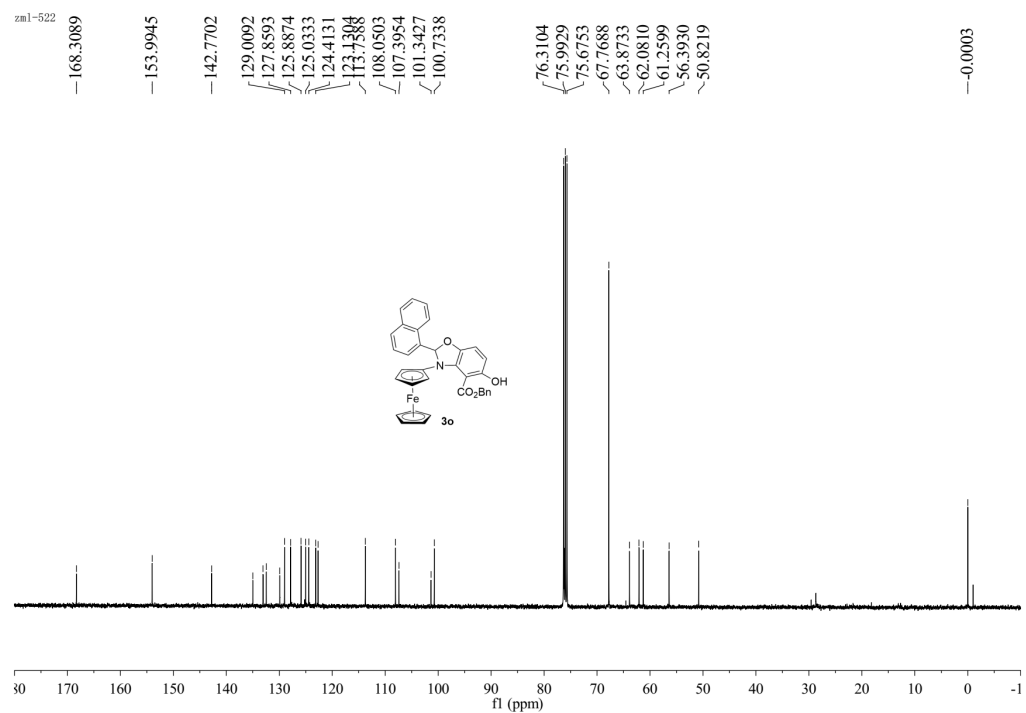

<sup>1</sup>H NMR of **3p**

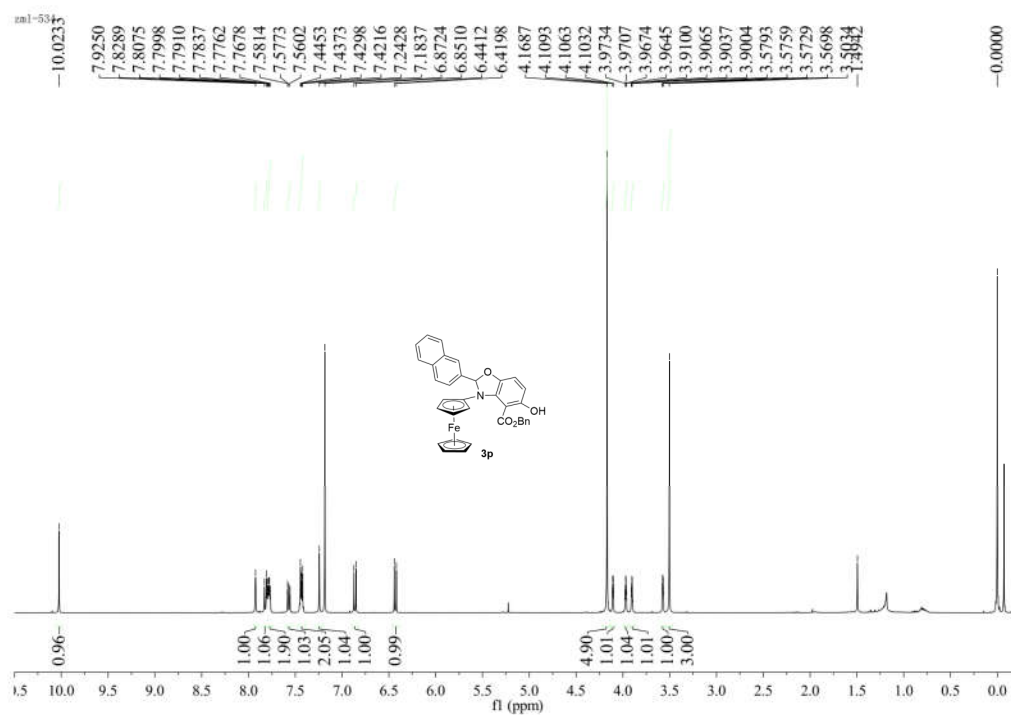

<sup>13</sup>C NMR of **3p**

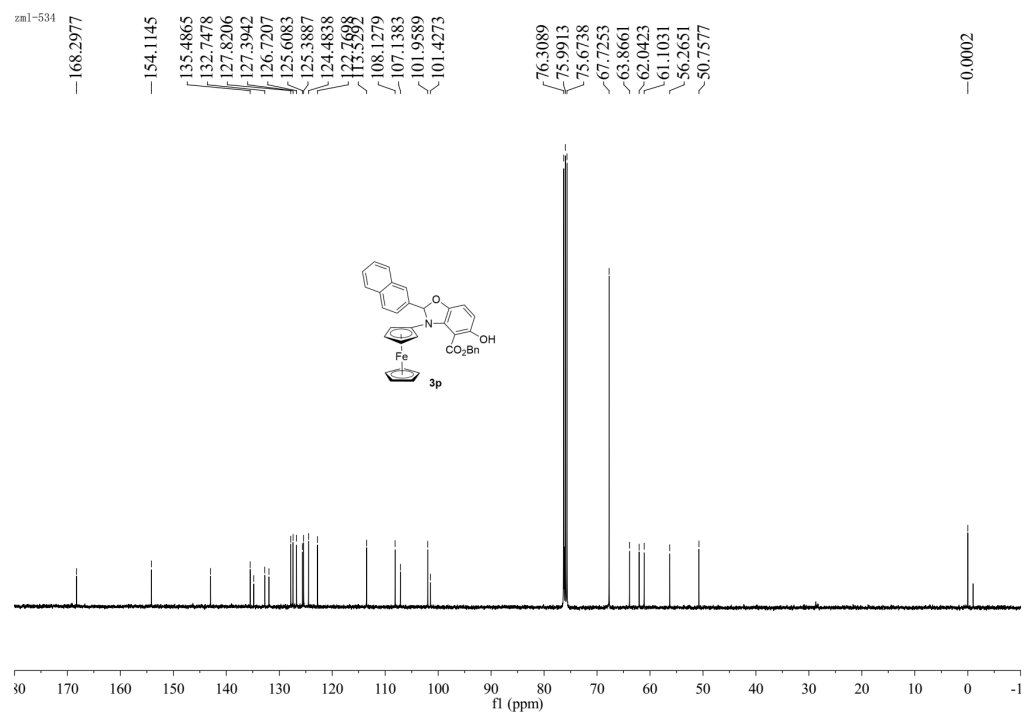

<sup>1</sup>H NMR of **3q**

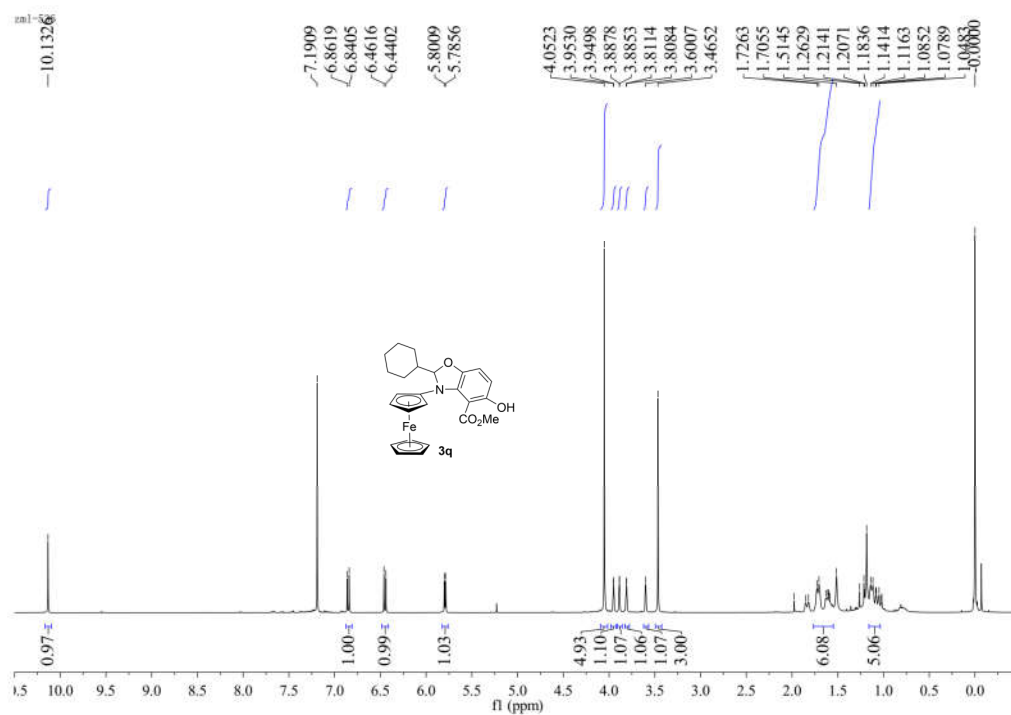

<sup>13</sup>C NMR of **3q**

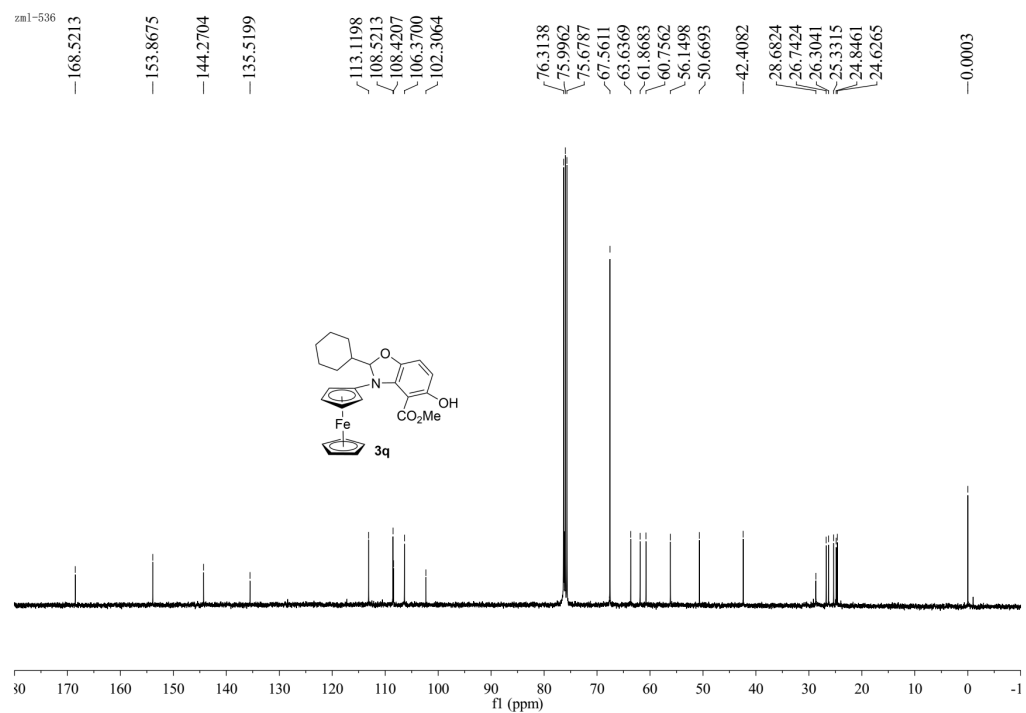

Supplement: s1 [file s1]
